# Supplementary material for: A socio-ecological examination of the primary school playground: Primary school pupil and staff perceived barriers and facilitators to a physically active playground during break and lunch-times
Source: PubMed Central journal article supplement (PMC8809583; doi:10.1371/journal.pone.0261812), 2022-02-02

# PLOS ONE

## A socio-ecological examination of the primary school playground: primary school pupil and staff perceived barriers and facilitators to a physically active playground during break and lunch-times.

--Manuscript Draft--

|                                                                                                                                                                                                                                                                                                                                                                                                                                      |                                                                                                                                                                                                                                                                                                                                                                                                                                                                                                                                                                                                                                                                                                                                                                                                                                                                                                                                                                                                                                                                                                                                                                                          |
|--------------------------------------------------------------------------------------------------------------------------------------------------------------------------------------------------------------------------------------------------------------------------------------------------------------------------------------------------------------------------------------------------------------------------------------|------------------------------------------------------------------------------------------------------------------------------------------------------------------------------------------------------------------------------------------------------------------------------------------------------------------------------------------------------------------------------------------------------------------------------------------------------------------------------------------------------------------------------------------------------------------------------------------------------------------------------------------------------------------------------------------------------------------------------------------------------------------------------------------------------------------------------------------------------------------------------------------------------------------------------------------------------------------------------------------------------------------------------------------------------------------------------------------------------------------------------------------------------------------------------------------|
| <b>Manuscript Number:</b>                                                                                                                                                                                                                                                                                                                                                                                                            | PONE-D-21-28206                                                                                                                                                                                                                                                                                                                                                                                                                                                                                                                                                                                                                                                                                                                                                                                                                                                                                                                                                                                                                                                                                                                                                                          |
| <b>Article Type:</b>                                                                                                                                                                                                                                                                                                                                                                                                                 | Research Article                                                                                                                                                                                                                                                                                                                                                                                                                                                                                                                                                                                                                                                                                                                                                                                                                                                                                                                                                                                                                                                                                                                                                                         |
| <b>Full Title:</b>                                                                                                                                                                                                                                                                                                                                                                                                                   | A socio-ecological examination of the primary school playground: primary school pupil and staff perceived barriers and facilitators to a physically active playground during break and lunch-times.                                                                                                                                                                                                                                                                                                                                                                                                                                                                                                                                                                                                                                                                                                                                                                                                                                                                                                                                                                                      |
| <b>Short Title:</b>                                                                                                                                                                                                                                                                                                                                                                                                                  | Barriers and facilitators to a physically active primary school playground                                                                                                                                                                                                                                                                                                                                                                                                                                                                                                                                                                                                                                                                                                                                                                                                                                                                                                                                                                                                                                                                                                               |
| <b>Corresponding Author:</b>                                                                                                                                                                                                                                                                                                                                                                                                         | Michael Graham<br>Teesside University<br>Middlesbrough, UNITED KINGDOM                                                                                                                                                                                                                                                                                                                                                                                                                                                                                                                                                                                                                                                                                                                                                                                                                                                                                                                                                                                                                                                                                                                   |
| <b>Keywords:</b>                                                                                                                                                                                                                                                                                                                                                                                                                     |                                                                                                                                                                                                                                                                                                                                                                                                                                                                                                                                                                                                                                                                                                                                                                                                                                                                                                                                                                                                                                                                                                                                                                                          |
| <b>Abstract:</b>                                                                                                                                                                                                                                                                                                                                                                                                                     | Using the socio-ecological model as a conceptual framework, the objective of this study was to determine playground users (primary school staff and pupils) perceptions of the barriers and facilitators to a physically active school playground. Results from a series of qualitative interactions with children (9 to 11 years old) and structured interviews with adult teachers revealed key differences in the child and adult perceptions of the playground and the purpose of break-times. A number of inter-related environmental boundaries and school policies were identified as restrictive to children's explorations and activity levels during 'free play' periods, which centred on resource availability, accessibility and health and safety. Further, traditional playground hierarchies act to promote and prevent physical activity engagement for different groups (e.g. gender and age). This study provides an opportunity for primary schools to reflect on primary school playground strategies and practices that are implemented at each level of the socio-ecological model to encourage a more effective use of the playground during school break-times. |
| <b>Order of Authors:</b>                                                                                                                                                                                                                                                                                                                                                                                                             | Michael Graham<br>Kevin Dixon<br>Liane B Azevedo<br>Matthew D Wright<br>Alison Innerd                                                                                                                                                                                                                                                                                                                                                                                                                                                                                                                                                                                                                                                                                                                                                                                                                                                                                                                                                                                                                                                                                                    |
| <b>Additional Information:</b>                                                                                                                                                                                                                                                                                                                                                                                                       |                                                                                                                                                                                                                                                                                                                                                                                                                                                                                                                                                                                                                                                                                                                                                                                                                                                                                                                                                                                                                                                                                                                                                                                          |
| <b>Question</b>                                                                                                                                                                                                                                                                                                                                                                                                                      | <b>Response</b>                                                                                                                                                                                                                                                                                                                                                                                                                                                                                                                                                                                                                                                                                                                                                                                                                                                                                                                                                                                                                                                                                                                                                                          |
| <b>Financial Disclosure</b>                                                                                                                                                                                                                                                                                                                                                                                                          | The author(s) received no specific funding for this work.                                                                                                                                                                                                                                                                                                                                                                                                                                                                                                                                                                                                                                                                                                                                                                                                                                                                                                                                                                                                                                                                                                                                |
| Enter a financial disclosure statement that describes the sources of funding for the work included in this submission. Review the <a href="#">submission guidelines</a> for detailed requirements. View published research articles from <a href="#">PLOS ONE</a> for specific examples.<br><br>This statement is required for submission and <b>will appear in the published article</b> if the submission is accepted. Please make |                                                                                                                                                                                                                                                                                                                                                                                                                                                                                                                                                                                                                                                                                                                                                                                                                                                                                                                                                                                                                                                                                                                                                                                          |

sure it is accurate.

#### Unfunded studies

Enter: *The author(s) received no specific funding for this work.*

#### Funded studies

Enter a statement with the following details:

- Initials of the authors who received each award
- Grant numbers awarded to each author
- The full name of each funder
- URL of each funder website
- Did the sponsors or funders play any role in the study design, data collection and analysis, decision to publish, or preparation of the manuscript?
- **NO** - Include this sentence at the end of your statement: *The funders had no role in study design, data collection and analysis, decision to publish, or preparation of the manuscript.*
- **YES** - Specify the role(s) played.

\* typeset

#### Competing Interests

Use the instructions below to enter a competing interest statement for this submission. On behalf of all authors, disclose any [competing interests](#) that could be perceived to bias this work—acknowledging all financial support and any other relevant financial or non-financial competing interests.

This statement is **required** for submission and **will appear in the published article** if the submission is accepted. Please make sure it is accurate and that any funding sources listed in your Funding Information later in the submission form are also declared in your Financial Disclosure statement.

View published research articles from [PLOS ONE](#) for specific examples.

The authors have declared that no competing interests exist.

**NO authors have competing interests**

Enter: *The authors have declared that no competing interests exist.*

**Authors with competing interests**

Enter competing interest details beginning with this statement:

*I have read the journal's policy and the authors of this manuscript have the following competing interests: [insert competing interests here]*

\* typeset

**Ethics Statement**

Enter an ethics statement for this submission. This statement is required if the study involved:

- Human participants
- Human specimens or tissue
- Vertebrate animals or cephalopods
- Vertebrate embryos or tissues
- Field research

Write "N/A" if the submission does not require an ethics statement.

General guidance is provided below. Consult the [submission guidelines](#) for detailed instructions. **Make sure that all information entered here is included in the Methods section of the manuscript.**

The study received ethical approval from the School of Health and Life Sciences ethics sub-committee at Teesside University (Application Number: 250/18). The study received written head teacher consent, written parent consent and written and verbal pupil assent prior to data collection.

**Format for specific study types**

**Human Subject Research (involving human participants and/or tissue)**

- Give the name of the institutional review board or ethics committee that approved the study
- Include the approval number and/or a statement indicating approval of this research
- Indicate the form of consent obtained (written/oral) or the reason that consent was not obtained (e.g. the data were analyzed anonymously)

**Animal Research (involving vertebrate animals, embryos or tissues)**

- Provide the name of the Institutional Animal Care and Use Committee (IACUC) or other relevant ethics board that reviewed the study protocol, and indicate whether they approved this research or granted a formal waiver of ethical approval
- Include an approval number if one was obtained
- If the study involved *non-human primates*, add *additional details* about animal welfare and steps taken to ameliorate suffering
- If anesthesia, euthanasia, or any kind of animal sacrifice is part of the study, include briefly which substances and/or methods were applied

**Field Research**

Include the following details if this study involves the collection of plant, animal, or other materials from a natural setting:

- Field permit number
- Name of the institution or relevant body that granted permission

**Data Availability**

Authors are required to make all data underlying the findings described fully available, without restriction, and from the time of publication. PLOS allows rare exceptions to address legal and ethical concerns. See the [PLOS Data Policy](#) and [FAQ](#) for detailed information.

Yes - all data are fully available without restriction

A Data Availability Statement describing where the data can be found is required at submission. Your answers to this question constitute the Data Availability Statement and **will be published in the article**, if accepted.

**Important:** Stating 'data available on request from the author' is not sufficient. If your data are only available upon request, select 'No' for the first question and explain your exceptional situation in the text box.

Do the authors confirm that all data underlying the findings described in their manuscript are fully available without restriction?

**Describe where the data may be found in full sentences. If you are copying our sample text, replace any instances of XXX with the appropriate details.**

- If the data are **held or will be held in a public repository**, include URLs, accession numbers or DOIs. If this information will only be available after acceptance, indicate this by ticking the box below. For example: *All XXX files are available from the XXX database (accession number(s) XXX, XXX).*
- If the data are all contained **within the manuscript and/or Supporting Information files**, enter the following:  
*All relevant data are within the manuscript and its Supporting Information files.*
- If neither of these applies but you are able to provide **details of access elsewhere**, with or without limitations, please do so. For example:

*Data cannot be shared publicly because of [XXX]. Data are available from the XXX Institutional Data Access / Ethics Committee (contact via XXX) for researchers who meet the criteria for access to confidential data.*

*The data underlying the results presented in the study are available from (include the name of the third party*

All relevant data are within the manuscript and its Supporting Information files

*and contact information or URL).*

- This text is appropriate if the data are owned by a third party and authors do not have permission to share the data.

\* typeset

Additional data availability information:

1 **Title:** A socio-ecological examination of the primary school playground: primary school pupil  
2 and staff perceived barriers and facilitators to a physically active playground during break and  
3 lunch-times.

4 **Short Title:** Barriers and facilitators to a physically active primary school playground

5 **Authors**

6 Michael Graham<sup>1</sup>, (corresponding author) [Michael.graham@tees.ac.uk](mailto:Michael.graham@tees.ac.uk) Orcid [0000-0002-  
7 3178-3226]

8 Kevin Dixon<sup>2</sup>, [Kevin.dixon@northumbria.ac.uk](mailto:Kevin.dixon@northumbria.ac.uk) Orcid [0000-0001-6109-4547]

9 Liane. B. Azevedo<sup>3</sup>, [L.azevedo@hud.ac.uk](mailto:L.azevedo@hud.ac.uk) Orcid [0000-0001-9966-9414]

10 Matthew. D. Wright<sup>1</sup>, [M.wright@tees.ac.uk](mailto:M.wright@tees.ac.uk) Orcid [0000-0002-4909-4162]

11 Alison Innerd<sup>1</sup>, [A.innerd@tees.ac.uk](mailto:A.innerd@tees.ac.uk) Orcid [0000-0002-5479-6652]

12 **Affiliations**

13 1 School of Health and Life Sciences, Teesside University, Middlesbrough, UK

14 2 Sport, Exercise and Rehabilitation, Northumbria University, Newcastle, UK

15 3 School of Human and Health Sciences, University of Huddersfield, Huddersfield, UK

16

17

18

19

20

21

22

23

24

25

26 **Abstract**

27 Using the socio-ecological model as a conceptual framework, the objective of this study was  
28 to determine playground users (primary school staff and pupils) perceptions of the barriers  
29 and facilitators to a physically active school playground. Results from a series of qualitative  
30 interactions with children (9 to 11 years old) and structured interviews with adult teachers  
31 revealed key differences in the child and adult perceptions of the playground and the purpose  
32 of break-times. A number of inter-related environmental boundaries and school policies were  
33 identified as restrictive to children’s explorations and activity levels during ‘free play’ periods,  
34 which centred on resource availability, accessibility and health and safety. Further, traditional  
35 playground hierarchies act to promote and prevent physical activity engagement for different  
36 groups (e.g. gender and age). This study provides an opportunity for primary schools to reflect  
37 on primary school playground strategies and practices that are implemented at each level of  
38 the socio-ecological model to encourage a more effective use of the playground during school  
39 break-times.

40

41

42

43

44

45

46

47

48

49



## 50 1. Introduction

51 High rates of physical inactivity have been reported among children of primary school age in  
52 the UK [1] and worldwide [2,3]. Physical activity in this age group is important for a number  
53 reasons; such as improved cardio-metabolic health [4,5], bone health [6], and mental health  
54 [7]. However, physical activity is a complex and multi-dimensional behaviour determined by  
55 numerous biological, psychological, sociocultural and environmental factors [8-12].

56 Ecological models of health (and physical activity) are one such method in considering a wide  
57 range of determinants. The socio-ecological model, originally developed by Bronfenbrenner  
58 [13] and adapted by Sallis Bauman & Pratt [14], focusses attention on the key individual,  
59 interpersonal, environmental and policy agencies that have an active role in health and  
60 physical activity promotion.

61 There is evidence to suggest interventions will fail to make long term, sustainable changes to  
62 daily moderate to vigorous physical activity (MVPA) if they fail to adequately consider the  
63 interactive characteristics between individuals and their environment at the intra-personal  
64 (individual), inter-personal (social), environmental and organisational/policy level [15,16]. For  
65 example, implementing changes at an individual level by encouraging engagement in  
66 physically active pursuits during break-times will only work if appropriate environmental and  
67 policy level changes are also implemented at the school. However, many childhood physical  
68 activity interventions do not consider the multi-level influences on children's behaviour during  
69 the intervention [17].

70 Despite the inconsistency associated with the design of physical activity interventions, it is  
71 universally accepted that interventions within the school environment are important, and for  
72 good reason [18]. Children between 5 and 11 years of age can spend up to 30 hours per week  
73 within the school environment [19] making it an ideal setting to promote physical activity.  
74 Within a school day, school break-times are reported to be the most favourable periods of the  
75 day for children [20], providing periods of time for children to “*catch up*” with their friends [21]

76 which can positively impact on the integration and adjustment to the school environment [22].  
77 However, as Baines and Blatchford [20] have indicated, schoolteachers (as part of the wider  
78 institution) and external policy makers tend to hold contrasting views. That is to say, school  
79 break-times are perceived by adult decision makers as a relatively unimportant pause in an  
80 otherwise busy day.

81 Notwithstanding, it is largely accepted that the 'free' play behaviours of children can be shaped   
82 by the contexts in which they are placed, and the wider geography of the environment, such  
83 as the human and physical dynamics of the space [23]. For instance, a previous playground  
84 observation study [24] found that increasing the amount of play features on a playground can  
85 increase the usage rate of these areas by 5 to 7%, per added feature for boys and girls,  
86 respectively. Colabianchi et al. [24] observed 20 recently refurbished urban school  
87 playgrounds and predicted that an increase of 10 items on the playground (e.g. sports courts)  
88 would increase usage by 50% in boys and 70% girls. However, previous systematic reviews  
89 of school break-time interventions have found both positive and negative effects on physical  
90 activity levels [25,26]. For example, there was no consistent effect in outcomes reported in  
91 multicomponent interventions (n=22) (including teacher training, line markings, staff and  
92 student training), or structured break-time interventions (n=7) (including sports coaches,  
93 organised games, PE activities introduced to break-times), with both positive and negative  
94 results reported on physical activity levels [26]. Whilst interventions which introduced loose  
95 playground equipment (n=5), though fewer in number, found consistent positive effects on PA  
96 levels [26]. However, a recent observation study highlighted that the type of equipment  
97 provided can have a negative effect on physical activity levels, such as providing equipment  
98 that is too advanced for the children's motor skill ability [27]. Therefore, it is likely the variety  
99 of effectiveness reported in the aforementioned studies are the result of contextual,  
100 organisational and cultural differences, and the funding and resources available for use during  
101 this period of the day.

102 In the UK, the Department for Education (DfE) provides eligible primary schools with funding  
103 from the Primary Physical Education and Sports Premium (PPESP) with the aim of enhancing  
104 the health and well-being of pupils. There is a growing amount of support for the use of the  
105 PPESP to enhance children’s play and activity by making changes to the outdoor environment  
106 [28,29]. Furthermore, one of the five key indicators aligned to the aim to support the  
107 engagement of all pupils in regular physical activity is ‘*encouraging active play during break-*  
108 *times and lunchtimes*’ [29]. Whilst the funding model and its key aims appear laudable and  
109 transparent, the extent to which the experiences and viewpoints of children are considered  
110 when designing suitable and sustainable outdoor play spaces remains unclear. 

111 According to Jones [30], many fail to consider the ‘otherness’ of childhood when trying to  
112 understand children’s engagement with activities during break and lunch-times, and in the  
113 design and development of a playground environment children will enjoy. Jones argues that  
114 when adults revisit their own childhood experiences they are ‘filtered’ by the experiences they  
115 have had since their adult becoming [30]. This is not to say these experiences are wholly  
116 irrelevant, but they cannot be straightforwardly applied or transferred to children lives today.  
117 As previous researchers have suggested, children operate with a different, more flexible and  
118 unfiltered negotiation of their world [30,31]. Previous well-intentioned methods of increasing  
119 physical activity in children has perpetuated a “controlling and oppressive way” [32] of coercing  
120 children to engage in physical activities. With this in mind, we join a growing list of scholars  
121 who argue that many adult prescribed and adult facilitated interventions can be  
122 counterproductive [33-35] and call for the meaningful inclusion of children and key supervising  
123 staff in the design of childhood play spaces in primary schools. 

124 Notwithstanding, the activities and spaces available to children during school break-time are  
125 often designed, chosen, and enforced by adults, leading to the creation of play spaces using  
126 the method of “seeing through the child’s eyes” [30]. Although there seems to be a genuine  
127 attempt from the adult population in the primary school environment to promulgate activities

128 that might be attractive to children [27] there must be some acknowledgement of the  
129 'unbridgeability' [30] between adult and child experiences.

130 Therefore, the aim of this study is to develop a deeper understanding of user's (children and  
131 supervising staff) perceptions of the current playground environment available to children  
132 during break and lunch times. Furthermore, to fully comprehend the interwoven and implicit  
133 subcultural constrictions and enablers of playground action, child and staff perceptions of the  
134 barriers and facilitators during designated physically active break-times are explored. Using  
135 the socioecological model, which recognises the interdependent relationship between the  
136 intra-personal (individual), inter-personal (social), and the environment, we explore some of  
137 the reasons why children engage, like and dislike specific areas of the playground. To the  
138 author's knowledge, this is the first socio-ecological investigation of the UK primary school  
139 playground environment that has aimed to identify barriers and facilitators of physical activity  
140 at each level of the socioecological model. In what follows, we argue that understanding how  
141 these factors interact and influence physical activity levels of children during school lunch and  
142 break-times can be used by policy makers and individuals in positions of seniority (e.g. head  
143 teachers, trusts, funding authorities, local authorities) when planning school playground  
144 provisions [16] and in the design of playground interventions.

## 145 **2. Methods**

146 The Consolidated Criteria for Reporting Qualitative Research (COREQ) checklist [36] was  
147 used to provide transparency and to ensure accurate reporting of the empirical data [37]. The  
148 methods that follow are a brief overview of the procedures used in this study.

### 149 **2.1 Recruitment**

150 Following ethical approval to conduct structured interviews with adults, and focus group  
151 activities with children in primary school educational settings (School of Health and Life  
152 Sciences ethics sub-committee at Teesside University, Application Number: **250/18**), five  
153 schools from the lowest 10% on the Index of Multiple Deprivation (English indices of

154 deprivation: Department for Communities and Local Government) from the Tees Valley in the  
 155 North East of England were contacted via email. Schools were selected using the list of local  
 156 schools ([www.gov.uk](http://www.gov.uk)) and were initially chosen for convenience of location and their urban  
 157 setting. Schools were eligible to take part if they had a minimum of one year five and one year  
 158 six class. Schools which matched this criteria were then contacted with details of the study.  
 159 Four schools returned expressions of interest and were contacted further to discuss the project  
 160 requirements and complete the school management consent forms. Head teachers from three  
 161 schools (Table 1) returned managerial consent. Study information and the relevant consent  
 162 forms were provided for eligible staff, parents of eligible pupils and pupils themselves (assent  
 163 forms). Staff consent and pupil assent were completed immediately prior to data collection.

Table 1. School demographics

|          | Children on record (n) | Female/male (%) | No. of focus groups per school | % free school meals |
|----------|------------------------|-----------------|--------------------------------|---------------------|
| School A | 565                    | 51 / 49         | 2                              | 47                  |
| School B | 520                    | 49 / 51         | 3                              | 49                  |
| School C | 303                    | 52 / 48         | 4                              | 68                  |

164

## 165 2.2 Participants

166 School staff that were in an active role within the playground or in physical activity promotion  
 167 within the school (PE specialist, health leads, heads and assistant heads, school classroom  
 168 teachers, playground supervisors and school sports coaches) and children from years five and  
 169 six (9 to 11 years old) were eligible to take part.

170 Children took part on focus group activities which were conducted over the course of one  
 171 school term. Staff were given the option of participating in a face to face structured interview  
 172 or completing the interview asynchronously using an open-ended questionnaire format. Table  
 173 2 reports the number of staff and children recruited in the study.

Table 2 Number of staff and children recruited

|           | Male | Female | Total (n) |
|-----------|------|--------|-----------|
| Staff (n) | N/A  | N/A    | 11        |

---

|            |    |    |    |
|------------|----|----|----|
| Pupils (n) | 31 | 34 | 65 |
|------------|----|----|----|

---

174 Abbreviations: N/A = not available.

175

## 176 **2.3 Data collection**

177 Data collection activities were conducted by members of the research team (MG and AI) that  
178 had previous training and experience of working with primary school aged children in a both a  
179 prescriptive (teaching and coaching) and facilitative role (research activity).

### 180 **2.3.1 Data collection – Child**

181 Focus groups, inclusive of a number of data collection activities has been used as an effective  
182 way to gather opinions and experiences of the children [38]. Focus groups are a rich method  
183 of revealing attitudes, experiences, and perceptions of the target audience [39]. They are  
184 particularly useful in the early childhood context, providing an effective means to involve  
185 children in research that they are directly implicated in and by. The research team used a  
186 variety of age-appropriate data collection techniques, such as visual prompts, mapping  
187 techniques and drawing activities. Techniques such as these, can spark children's interest  
188 and maintain concentration whilst providing opportunities for children to more effectively  
189 engage with the task [40-42].

190 The focus group discussions were designed to last for a maximum of 60 minutes, as  
191 recommended by previous research on the topic [38] and were conducted in a segregated,  
192 quiet, informal space within their familiar school environment. To be confident in successful  
193 data collection and provide a positive experience for the children we limited group size to eight  
194 children [41]. At the start of each focus group, children were welcomed and introduced to the  
195 focus group facilitators and read the summary of the information previously provided to them.  
196 School staff were not present during the child activities as it was felt that the presence of these  
197 authoritative figures might have affected the honesty in responses.

198 All focus group discussions were digitally recorded using audio devices. Noticeable changes  
199 in body language or persistently repeated opinions were recorded in the facilitator notes to aid  
200 in transcription, to support the outputs from the variety of focus group activities and to ensure  
201 accuracy of the adult perception (i.e., the research team) of the child's experience/response.  
202 Children were told the devices *"are here to record the discussions we have today about your  
203 playground. They will only be used by the research team and the recordings will not be shared  
204 with anyone else"*. Nevertheless, there were a few occasions where the children sought  
205 confirmation of anonymity; *"will my teacher see this?"* This highlighted the power imbalance  
206 between adults and children within this setting. Reinforcing the anonymous nature of their  
207 responses and explaining that the role of the facilitators in this activity was to listen to their  
208 experiences and stories and not to judge or discipline the children [38] served the purpose of  
209 removing any anxiety of 'getting into trouble' for speaking openly, and reduced the inherent  
210 power imbalance between adults and children with the facilitator from this point on being  
211 perceived by the children as part of the group, maximising interaction and honesty.

212 During transcription, individual responses were coded by participant number only (e.g., pupil  
213 1, pupil 2 etc.) through the recognition of a change of voice. Focus group activities continued  
214 until facilitators believed the groups had reached a saturation point [43], at which point the  
215 subsequent activities described below were introduced.

216 The first task required children to highlight on an A3 map of their playground, areas they liked  
217 and disliked, and provide reasons for their responses (Figure 1). Mapping techniques and  
218 visual prompts have been identified as an innovative and useful way for children to express  
219 their views about the use of the spaces they occupy [38,42]. Children were encouraged to be  
220 creative and draw on the maps if they wished. This activity was designed to gain a wider  
221 contextual understanding of the children's perception of the playground environment [16].

222

223 Figure 1 Aerial playground mapping activity

224

225 Children were then asked to write the skills they perceived as necessary to use each  
226 playground area on sticky paper notes and place them on the map over the corresponding  
227 playground area. On completion of this task, children then removed the sticky notes and  
228 placed them in a line from the most to least important, in terms of being able to use the  
229 playground effectively (Figure 2). The outputs from this task were used to identify any specific  
230 skills that children perceived as necessary to be able to be physically active in each of their  
231 previously identified playground zones.

232

233

234 Figure 2 Skill requirements of playground areas and order of importance

235 For the next task children were given an A4 piece of paper and a selection of pens and pencils  
236 and were asked to draw the image that came into their head when thinking of a playground  
237 supervisor (Figure 3). Previous studies exploring the effect of the management and  
238 supervision of playground activities on the level of PA during break-times have found  
239 contrasting results [27,44,45]. This suggests that the roles, actions and behaviours of  
240 playground supervisors can have either positive or negative connotations on children's  
241 behaviour [46]. Using creative approaches, such as drawing, can be more effective in  
242 interpreting a child's perception of their experiences and emotions [47]. To help them get  
243 started with the task children were first asked to write some words down that described their  
244 experiences of playground supervisors in their school playgrounds.

245

246 Figure 3 Playground supervisor drawings

247

248

249 The final focus group activity was designed to allow children complete anonymity and remove  
250 themselves entirely from the confinement of restrictive adultist opinion. Children were given  
251 one piece of A5 paper and asked to "write one wish for the playground that would make it  
252 better and help you be more active during break-time". The children were then asked to fold



253 their piece of paper in to a small square and post it into *'the secret box'*. Previous work has  
254 suggested a 'secret box' activity removes the fear children have of sharing their thoughts and  
255 opinions [40].

256 The facilitator's role in these tasks was to look for clarity in the responses and activity outputs,  
257 to ensure the children had considered each of the task requirements, and stimulate further  
258 discussion amongst the group. The discussions were used to get more accurate  
259 interpretations of the outputs during audio transcription.

### 260 **2.3.2 Data collection - Staff**

261 Staff were first offered a one-to-one interview to discuss the a priori themes of the project;  
262 *barriers* and *facilitators* to a physically active playground during school break-time. However,  
263 gatekeepers at each of the schools expressed a concern from teachers on allocating time from  
264 their day to meet with the researcher. Furthermore, there was a concern that senior leaders  
265 at the school would be able to identify who had and hadn't taken part in the project. For this  
266 reason, staff were given the option of interview or questionnaire. All participating staff chose  
267 to complete the questionnaire in their own time and were asked to be as detailed as possible  
268 in their responses on the questionnaire, using additional pages if needed. Staff were offered  
269 the option of providing contact details if they were happy to be contacted further for any  
270 responses requiring clarification. No member of staff provided these details.

### 271 **2.4 Thematic data handling and analysis**

272 Qualitative data for both focus groups and asynchronous interviews were analysed using the  
273 process of thematic data analysis as described by Braun and Clarke [48]. This 6 stage  
274 approach allows a more detailed contextual examination of the pre-identified ideas,  
275 assumptions, and ideologies underlying these a priori themes without sacrificing its flexibility  
276 to provide "a rich and detailed, yet complex account of the data" [48; pg.5] that is both  
277 theoretically and methodologically sound; and can be widely used across a range of  
278 epistemologies and research questions [49].

#### 279 **2.4.1 Child Focus Groups**

280 The first task for data analysis involved two researchers reading through every focus group  
281 activity the children had completed to begin to identify recurring themes across each of the  
282 groups (stage 1 - familiarisation with the data). Each activity was then reviewed again, and  
283 initial features of the data coded in a systematic fashion to collate data relevant to each code  
284 (stage 2 – generation of initial codes). Activities were reviewed a third time whilst listening to  
285 the associated audio recording from the matched focus group to ensure the children’s written  
286 points had been interpreted accurately. Audio recordings were not transcribed “verbatim” but  
287 were used to ensure that valuable detail relating to the context and the specific nature of the  
288 written responses were captured [50]. Excerpts from the audio recordings which matched and  
289 supported the focus group activity outputs were transcribed verbatim (by each researcher)  
290 and transferred to the table of responses and coded accordingly. As codes were collated,  
291 potential themes began to emerge and all relevant codes (and associated data) were  
292 transferred under these themes (stage 3 – search for themes). On completion, themes and  
293 the associated data items (audio transcriptions and written text) were then reviewed to check  
294 for accuracy of interpretation and for any repetition across themes (stage 4 – review of  
295 themes).

296 The latent themes that emerged as a result of the aforementioned analysis were grouped  
297 under the component titles of the socio-ecological model; individual, interpersonal, physical  
298 environment and policy (stage 5 – Definition and names of themes). The multi-level framework  
299 that the socio-ecological model provides, allows for a constructionist and interpretative  
300 examination of the range of socio-cultural factors that can influence physical activity levels  
301 during school break-times [16,48]. This final activity facilitated the creation of the final thematic  
302 map and the final interpretive report (stage 6 – production of report) [48].

#### 303 **2.4.2 Staff Asynchronous Interview Forms**

304 Completed staff forms were read in full prior to analysis to identify commonality across all  
305 responses and to become familiar with the data. Data was then coded and handled following  
306 the same processes described above. Responses from the child focus groups and staff  
307 responses that did not recur frequently but that had particular resonance due to the language  
308 used were grouped under the same code ('valuable insight').

### 309 **3. Outcomes**

310 A total of 65 children were recruited and provided parental consent and initial assent. At the  
311 time of data collection four children were absent and three withdrew assent prior to the start  
312 of the focus groups. The remaining 58 children (52% female) participated in focus group  
313 activities.

314 Eleven members of staff from across the three schools returned consent to take part in the  
315 study. Figure 4 and Figure 5 display the final thematic map for children and staff, respectively.  
316 The thematic map is inclusive of the a priori themes (barriers and facilitators) and the deductive  
317 themes from each of the data collection activities (playground map, essential skills, supervisor  
318 drawings and discussions) and their association to each of the socio-ecological model  
319 components. The secret box activity was also analysed in respect to the socio-ecological  
320 model but did not contribute the themes identified in the thematic map.

321  
322 Figure 4 Final thematic map showing the socio-ecological barriers and facilitators to a physically active  
323 playground from the school children's perspective

324  
325  
326  
327 Figure 5 Final thematic map showing the socio-ecological barriers and facilitators to a physically active  
328 playground from the school staff perspective

329  
330  
331 A full list of the secret box responses can be seen in Table 3. Responses are separated for  
332 children and staff and divided into small and large wishes dependent on the resources  
333 (physical and monetary) needed or the surface area required [16]. Further, the wishes are  
334 separated into categories based on their desired outcomes (i.e., physical environment,

335 individual/interpersonal or policy). Children’s wishes focussed on play, adventure, and fun.  
 336 Wishes were predominantly concentrated on the provision of new equipment and longer  
 337 break-times. Staff wishes for the school playground focussed on a wider development of  
 338 playground structure, policy changes, management and support.

Table 3. School children and staff magic wish responses.

|                       | Children                                                                                                                                                                                                                                                                                                                                                                                           | Staff                                                                                                                                                                                                                                                                                                                                                                                         |
|-----------------------|----------------------------------------------------------------------------------------------------------------------------------------------------------------------------------------------------------------------------------------------------------------------------------------------------------------------------------------------------------------------------------------------------|-----------------------------------------------------------------------------------------------------------------------------------------------------------------------------------------------------------------------------------------------------------------------------------------------------------------------------------------------------------------------------------------------|
| Physical environment  | Small items                                                                                                                                                                                                                                                                                                                                                                                        | <ul style="list-style-type: none"> <li>• Scooters and bikes</li> <li>• Be able to use the grass</li> <li>• More equipment*</li> <li>• New fresh games</li> </ul>                                                                                                                                                                                                                              |
|                       | Large items                                                                                                                                                                                                                                                                                                                                                                                        | <ul style="list-style-type: none"> <li>• Obstacle course</li> <li>• VR booth</li> <li>• More options for indoor play*</li> <li>• Climbing wall with buzzers</li> <li>• Running track</li> <li>• A field so we can do rugby</li> <li>• Make a basketball pitch</li> <li>• More playground things</li> <li>• Swimming pool</li> <li>• Big massive slide</li> <li>• Big Bouncy castle</li> </ul> |
| Individual and Social | <ul style="list-style-type: none"> <li>• Cargo nets</li> <li>• Monkey bars* and gym equipment</li> <li>• Slides*</li> <li>• Swings*</li> <li>• Seesaw</li> <li>• Tyres</li> <li>• Bikes and scooters*</li> <li>• More equipment*</li> <li>• Make it more fun</li> <li>• Trampolines*</li> <li>• Something fun – like hunts</li> <li>• Fairer games</li> <li>• Spider net climbing frame</li> </ul> | <ul style="list-style-type: none"> <li>• A school field for summer to avoid confrontation</li> <li>• New grassy area</li> <li>• Overhaul of the outside area - more engaging</li> <li>• MUGA on the concrete area (less injuries)</li> <li>• More outdoor to explore</li> <li>• A more interesting environment to explore</li> <li>• More space</li> <li>• A sheltered area</li> </ul>        |
| Policy                | <ul style="list-style-type: none"> <li>• I wish to make everyone happy on the playground</li> <li>• More exciting games with more people</li> <li>• Do dangerous stuff</li> </ul>                                                                                                                                                                                                                  | <ul style="list-style-type: none"> <li>• Self-regulation</li> <li>• Personal power and resilience – to cope with losing</li> </ul>                                                                                                                                                                                                                                                            |
|                       | <ul style="list-style-type: none"> <li>• More options for indoor play*</li> <li>• More time*</li> <li>• Tag rugby coach</li> <li>• Less tolerance to bullies</li> <li>• More time on the ball-court</li> <li>• To be able to use key stage1 (5 to 7 years old) playground*</li> </ul>                                                                                                              | <ul style="list-style-type: none"> <li>• Training for staff*</li> <li>• Training for playground leaders*</li> <li>• More equipment</li> <li>• Involve staff more</li> </ul>                                                                                                                                                                                                                   |

\*Items occurred multiple times in magic wish responses (multiple = three or more)

339  
 340  
 341

**4. Discussion of research findings**

342 The following is a further presentation of focus group outcomes, discussed in light of theory  
343 and research on the individual, interpersonal, environmental and policy influences (barriers  
344 and facilitators) on children's physical activity engagement during school break and lunch-  
345 times and is subdivided according to the components of the socio-ecological model.

#### 346 **4.1 Individual and interpersonal factors (children)**

347 From the perspective of the children, individual level facilitators of physical activity focussed  
348 predominantly on the intrinsic desires to have fun (*"Because my friends push me on the low  
349 swings, it's fun"; "it is fun to try new things"; "me and my friends play games here...the maze  
350 game because it is fun"; "we play tag, it's very fun"*), for the enjoyment of activities (*"I like it  
351 because I get to play football"; "I like playing there because I can play leapfrog"; "I like it cause  
352 we can play tennis and get tennis rackets"*) and the belief they will do well in a specific activity  
353 (perceived competence) (*"...football is a good sport for me"; "...because I likely do well"*).

354 Thus, congruent with the work of Snow et al. [35] who conducted focus groups on 8 to 10 year  
355 old girls, children in this study cited fun, physical competence and mastery of skills as a major  
356 influence on the engagement in play. In terms of physical competence, Barbour [51] suggested  
357 that the type of activities children take part in are a result of similarities in movement ability  
358 and movement skill competency, with children of low physical competence reluctant to  
359 approach activities requiring a higher level of ability. Evidence suggests that when  
360 fundamental movement skills are taught to younger children (4 to 9 year olds), increases in  
361 confidence in their ability results in participation in physical activity during other parts of the  
362 day [52]. As children age they are more aware of their ability, or lack thereof, and as a result  
363 less likely to participate in activities they desire for fear of embarrassment [52,53]. The desire  
364 for actual physical competence in Snow et al. [35] and the engagement (or disengagement)  
365 in specific activities due to perceptions of physical competence in this study are slightly  
366 difference concepts. However, the aspirations for and perceptions of competency were driven  
367 by the same yearning for a sense of social belonging.

368 Children in this study identified that they took part in activities that they *“would likely do well*  
369 *at”* but also participated in activities and occupied playground areas for social reasons,  
370 irrespective of any assessment of physical competence and in the absence of a specified  
371 activity (*“this is where my friends are”*; *“because most of my friends play here”*; *“because my*  
372 *friends are here...”*). Parrish et al. [52] focus group findings from children aged 9 to 11  
373 highlighted that children were more likely to take part in games their friends were playing, even  
374 if they had a desire to play something else. One group of children in this study, when  
375 discussing the activities on their playground highlighted:

376 *“let everyone take part and be nice, we don’t really care what skills you have we*  
377 *just like letting people play, it’s just about friendship”*

378 Previous research suggested that there is more than a simple gender preference  
379 operational when children select areas of the playground to “play” in [27]. The influence  
380 of physical competence, perceived physical competence and friendship identified here,  
381 re-enforces this assumption and highlights the potential impact of positive peer  
382 relationships and social position as a driver for physical activity engagement. During  
383 analysis, there was a clear interaction between findings at each level of the socio-  
384 ecological model. However, this interaction was particularly evident between the  
385 individual and interpersonal items in the model. Many of the ‘individual’ factors children  
386 gave for liking and disliking areas were driven by the desire for ‘social’ interaction or  
387 ‘social’ play. For example, the individual desire for quiet and relaxation (*“I like it because*  
388 *it’s a good place to private talk”*) and for playing games (*“me and my friends play games*  
389 *here”* and *“I play tag with my friends”*), were grounded by positive peer relationships.

390 The desire for children to engage in social games, requiring more than two people could be  
391 perceived as a method employed by the children in this study at increasing the ‘quality’ of their  
392 friendships

393           *“because we get to run around and play bulldogs”, “we sometime get to play*  
394           *football tennis”, “we play football and sometimes tig”, “we play hide and seek”.*

395       However, the opportunity for social play was also often linked to less desirable playground  
396       experiences (*“there are too many footballs”, “there are a lot of fights and it stops playing”, “play*  
397       *is too rough”*) and traditional playground hierarchies (*“the boys take the ball court most of the*  
398       *time”, “because other year groups use it”, “a lot of fights with year 6’s”*) which could be  
399       considered as barriers to physical activity for individuals who avoid competitive games for fear  
400       of conflict and to avoid the hegemonic masculinity [54] of the sporting (predominantly football)  
401       culture of the primary school playground [55].

402       Hegemonic Masculinity is a term popularised by sociologist R.W. Connell [54], to explain the  
403       recurring socially constructed practices that promote the dominant social position of males  
404       and the subordinate position of females across the life cycle. Within a school playground  
405       environment children can become invested in activities that help them to construct and  
406       maintain a gender identity [56,57], with the environment and their peers often enabling their  
407       construction of ‘masculinities’ and ‘femininities’ [57]. Although the presence and the magnitude  
408       of the effect of these practices are likely school dependent, due to the varied  
409       management/supervision of the playground between schools, football and fighting is an  
410       activity that many boys continue to use to solidify their masculinity [56].

411       Some of the girls in this study identified hegemonic masculinities that are displayed during  
412       break-times. As an example, the following conversation between three participants is worth  
413       citing at length. On this occasion we use pseudonyms to enable the reader to distinguish  
414       between participants.

415           **Pupil 1:** *“we don’t like playing here because you get hurt and the boys kick the*  
416           *footballs at you” (Girl)*

417           **Pupil 2:** *“there is loads of fights” (Girl)*

418 **Pupil3:** *“No...” (Boy)*

419 **Pupil1:** *“YEAH THERE IS” (Girl)*

420 **Pupil 2:** *“have you seen how many fights happen” (Girl)*

421 **Pupil 1:** *“there was a fight here” (Girl)*

422 **Pupil 3:** *“oh yeah there was a fight there the other day” (Boy)*

423 **Pupil 3:** *“we have fights constantly” (smiling) (Boy)*

424 **Pupil 1:** *“I hate it” (Girl)*

425 One boy in this group can initially be observed trying to address these statements by perhaps  
426 claiming either the absence of fights or trying to explain the reason for fights, before he is  
427 interrupted. He then concedes and becomes somewhat proud with a contented claim of *“WE*  
428 *have fights constantly”*. Whether he actively participates in this behaviour or not, this statement  
429 could be perceived as attempt to associate himself to these hegemonic masculine behaviours  
430 deemed important for his social status.

431 Football has been [55] and continues to be [33,58] the predominant activity dominating  
432 playground space. Similarly, the schools participating in this study had playgrounds which  
433 were monopolised by the established football space (marked and worn out pitches, caged  
434 football zones, painted goals on walls). The domination of the playground space for football  
435 leads to a desperate rush by children at break-times, to preside over the remaining playground  
436 space. Thomson [33] observed children claiming possession of playground space by marking  
437 areas with their coats and school bags for their activities and any attempt at invasion from  
438 others resulted in retaliation and conflict. This issue becomes exacerbated during winter  
439 months when access to the play spaces hosting these dominant playground games is  
440 prohibited, directing these activities into the already contested areas of the playground.

441 **4.2 Individual and interpersonal factors (adult supervisors)**



442 Similar individual level facilitators were identified from staff outputs with play, exploration and  
443 enjoyment identified as key to children's participation in activities.

444 *"Children like to climb on the rocks and tyres"; "children often look to play their own*  
445 *games..."; "children like freedom and unstructured play"; "children enjoy playing*  
446 *football"; "children enjoy the ball court and playing football"*

447 Although adults (staff) in this study seem to understand the individual value of play, they  
448 identified more frequently with the extrinsic values of peer relationships and social  
449 development:

450 *"teamwork and collaboration"; "ability to listen to others"; "...take turns and play*  
451 *fair", "need to understand the rules"; "social is important to feel comfortable playing*  
452 *in front of others"*

453 Previous research exploring children's geographies has highlighted that the intrinsic value of  
454 play is not acknowledged by teachers and policy makers [35] and that opportunities for play,  
455 particularly outdoor play is decreasing with increased emphasis on classroom based, adult  
456 organised activities [59,60]. Furthermore, adults colonise children's places and create safe  
457 and easy to monitor play spaces which often means the naturally sporadic and exploratory  
458 play behaviours of children [33,61] are perceived as disruptive and undesirable, and are  
459 consequently dealt with 'accordingly' (*"children need to be guided on how to play safely",*  
460 *"children need to be aware they will be punished (equipment removed) for bad behaviour"*).

461 The staff opinions on the 'correct' use of the playground could be interpreted from a dualist  
462 perspective, whereby there is either a right or wrong way of 'playing'. Although one cannot  
463 argue that children will benefit from *"teamwork and collaboration"* and an *"ability to listen to*  
464 *others"* throughout their child, adolescent and indeed adult becoming; the adult regulation and  
465 enforcement of these qualities goes against the nurturing concept of physical literacy [62].  
466 Children develop a natural, more flexible interaction with the environments that surround them  
467 and can be very creative and innovative when adapting architectural features of the

468 playground such as bins, bollards, fencing, walls etc. [33]. Objects in the environment are not  
469 inanimate features to which we ascribe an abstract concept but are meaningful in a sense that  
470 they 'engage' with us, indicating how we can interact effectively with them [63]. Children in this  
471 study identified areas of the playground that to the researcher looked unusable. However,  
472 children circled these areas for the inanimate objects (bollards, rocks) that existed there (for  
473 example, *"I like playing here cause I can play leapfrog"*). However, these behaviours are often  
474 stifled by staff on the playground perceiving their use as inappropriate and unsafe (*"children*  
475 *given free choice often decide on inappropriate games"*; *"children need to follow the rules and*  
476 *understand what they can and can't do"*), and because they do not fit in with their framework  
477 of rules. Jones [30] suggested adult constrictions, desires and agenda restrict children's lives  
478 and their practices when discovering their identity in a changing environment.

479 Children learn very early on the notion of rule keeping and are generally faced with a daily list  
480 of 'don'ts' before entering their play space [33]. Crease [64] explains that infants go through a  
481 number of stages in their becoming, described as first 'I move', then 'I can', and finally 'I can  
482 do'. A large proportion of children in this study were faced with physical barriers, boundaries  
483 and rules which reduced their freedom to 'move' and therefore unable to explore the 'I can'  
484 and subsequently the 'I can do...'

485

486

### 487 **4.3 Environment and policy level**

488 As previously mentioned, the large open spaces identified in this study were predominantly  
489 grass fields and expansive concrete areas. Children highlighted these areas as positive for  
490 their promotion of team games, playing with friends and their soft surfaces. However, the  
491 children also highlighted that these areas often flood in wet weather leading to prohibited  
492 access due to adverse conditions. The data from the children and staff suggest that this is an

493 issue that needs addressing at policy level with adequate investment in facilities for all  
494 weathers:

495 Children

496 *“sometimes not allowed here when it is wet or muddy”, “can’t use it when it is full*  
497 *of snow”, “not allowed in when it is snowing”, “we are not allowed on the grass*  
498 *when it is wet”, “we are not allowed on when it is icy or snowy cause we might fall*  
499 *over and get hurt”, “when it rains there are puddles for weeks”*

500 Staff

501 *“space is a problem when the grass is wet, children are confined to the hard area*  
502 *which prevents children playing”; “bad weather prevents physical activity at break*  
503 *times”; “not being able to use the field when it is wet has a negative impact as*  
504 *children are not allowed footballs on these days”, “rock area is dangerous when it*  
505 *is wet”*

506 As one child said *“if it is raining, why not put a roof on the MUGA”*. Similar findings from  
507 Australian children, also recognised the need for ‘weather protection’ [65], demonstrating that  
508 despite very different weather conditions, the play restrictions being enforced on children in  
509 primary school playgrounds is an issue experienced internationally.

510 The appearance of staff members on the playground acting like shepherds tending their  
511 disobedient flock may be driven more by the inadequate investment at a policy level in the  
512 children’s physical, social and emotional development during this important period in a child’s  
513 day [59]. This was further highlighted by a number of staff members who identified a lack of  
514 staff resources prevented them from engaging in anything other than crowd control (*“there is*  
515 *lots of activity and a lot to monitor for just two members of staff”, “not enough staff being able*  
516 *to supervise and keep children safe”, “staff are limited, we already have some staff on the*  
517 *playground but not all the time and they can’t cover everywhere”; staff are occupied dealing*

518 *with behaviour so seldom able to engage with activities*”). This is in contrast to self-report  
519 findings from national (UK) school surveys from 1995 to 2017 which identified that there are  
520 now more adults supervising than there has been in the previous twenty-two years [59].  
521 Although these numbers are likely school dependent, the actions of the supervisors may be  
522 more important than the numbers available [27]. Children highlighted the potential for teachers  
523 to act as facilitators (*“some teachers won’t come out but ‘Miss D’ played like Mr Fox or*  
524 *something with us before but not many (teacher) do”*) but are too often restricted by the number  
525 of staff available (*“sometimes there is only one member of staff on duty so we have to stay*  
526 *where the teacher can see them so they are safe and don’t get hurt”*; *“...but I do get it cause*  
527 *there are only like two dinner nannies”*; *“that’s the part we are not allowed down, well we are*  
528 *sometimes but not all days when we don’t have teachers, because when it (the bank) goes*  
529 *down the teachers can’t see us”*).

530 Children at participating schools had a mix of teachers, teaching assistants, ‘dinner nannies’  
531 and ‘playground friends’ that helped monitor the playground during break-times. Children  
532 highlighted they would like their teachers to be more involved during break-time but highlighted  
533 they wanted teachers based on ‘sportiness’ (*“...because they are good at sport”*, *“teachers*  
534 *are not that sporty”*, *“Mr T and Mr L are the sportiest but there are no more sporty ones”*, *“our*  
535 *teachers are not that sporty, there is only like three and they are not that sporty”*).

536 Although in the current study we were unable to distinguish between staff positions within the  
537 school (head teacher, teacher, teaching assistant etc.) due to the anonymous nature of the  
538 staff responses; previous research has found that head teachers from different schools have  
539 very different ideas about the value and role of break-time [20] and therefore, the behaviours,  
540 actions and opinions of the staff (from staff and child perspectives) in the current study may  
541 be a result of (or lack of) the agenda at senior management levels.

542 Overall, staff perceived their role as a combination of encouraging a supportive and safe  
543 environment (*“supervisors should be at their station, organising resources and facilitating”*,

544 *“adult presence ensures that children feel safe and are used for advice and support if needed”*  
545 and promoting engagement in physical activity (*“my role is to keep children safe and happy*  
546 *and to encourage some children to be active”*). However, the perception from children was  
547 that the role of playground staff is for safety and the enforcement of rules and boundaries  
548 (*“sometimes we do use here for bulldogs, but the younger ones are doing it now so we are*  
549 *not allowed”, “if we go on there the teachers can’t see us and we’ll get dirty”, “dinner nannies*  
550 *say we can only play with your own year group...it’s so annoying...”*, *“they look after us, stop*  
551 *fighting and help people who are hurt”*).

552 The active interest of the adult members of staff in the school were explored during the  
553 playground supervisor and playground activities tasks. When asked about the staff who were  
554 present on their playgrounds during break and lunch-times, this is just a sample of the words  
555 the children used to describe them:

556 *Safe; loving; try to keep us safe from bully’s; caring; angry; helping; laughable;*  
557 *sharing; bossy; hardworking; respectful; kind; mad; safety; hate.*

558 Although mostly positive, the variety of qualities cited by the children gives an idea of the  
559 variety of adult personas that occupy children’s playgrounds during break-times. It is therefore  
560 important that these staff members understand the importance of their behaviours and the  
561 positive influence they can have on the social and physical activity behaviours of the children  
562 who occupy the playground space.

563 From the variety of staff and child accounts provided in this study and in previous studies  
564 [16,33] on the level and role of staff interaction during break-times it seems that, beyond child  
565 safety, there is no standardised, universally accepted requirement for behaviour of playground  
566 staff in the primary school setting. This allows for a large variation in the day to day  
567 management of the school playground, dependent largely upon the member of staff who  
568 happens to be ‘on duty’ that day (mood, personality, personal agenda, etc.).

569 All the schools in this study were in receipt of the PPESP. Only one school in this study  
570 mentioned break-times as part of their planning, with structured lunchtimes with a sports  
571 coach, lunch supervisors and pupil leaders to target inactive children during break-time  
572 reported. Whilst this one school's acknowledgement of break-times as a period of time that  
573 would benefit from investment, the plans and ideas mentioned previously were alongside the  
574 provision for the daily mile, access to new sports and activities and a lunchtime wake up dance  
575 activity – all of which was allocated a combined £750 from the £19,520 PPESP allocated to  
576 this school.

577 Whilst the physical activity levels of children during break-times is much more complex [66]  
578 the lack of valuable and sustainable investment in playground provision is worrying and in  
579 contrast to the recommendations provided by the DfE [29]. A continuation in the  
580 marginalisation of break-times for more curricular focussed adult led activities (i.e., PE);  
581 alongside a reduction in time provided for break-times [20] and inadequate investment in the  
582 primary school playground provision, will lead to further reductions in exploratory play and  
583 reduced opportunity to develop physical literacy. Furthermore, without recognition of the  
584 importance of break-times in children's physical, social and emotional development and the  
585 provision of a sustainable intervention, the current playground behaviours will continue to re-  
586 enforce the adult-child power distribution [30].

## 587 **5. Summary and conclusion**

588 This study aimed to use the socio-ecological model to explore school children's and school  
589 staff perception of the school playground and identify reasons for enjoyment, engagement and  
590 dissociation with specific playground areas. There have been limited studies exploring the  
591 socio-ecological model components within a school context [16] and to our knowledge this is  
592 the first use of this framework to qualitatively explore the complex contexts presented to UK  
593 primary school children during their 'free play' time.

594 This qualitative evaluation has identified differences between the adult and child perception of  
595 the primary school playground. These differences affirm the need to actively include children  
596 in future playground planning. Many schools ask their pupils '*what should we do?*' Or '*what*  
597 *would you like on the playground?*' However, for most, this is where this partnership ends.  
598 This does not go unnoticed by the children who have invested a part of themselves in these  
599 tasks ("*the teacher said we could get like a science area outside to grow plants and things but*  
600 *she never did it...I don't know why*"). It is important to follow up on these activities and  
601 feedback to the children on the actions been taken, even if the outcome may be perceived as  
602 undesirable, so that they feel that their opinions are heard and of value [41].

603 This somewhat unconscious stance of power and knowledge is often overlooked in  
604 environments where the focus is on making well-intentioned changes to the environment 'for  
605 the children's sake'. However, the issue still remains and we, as adults know little about the  
606 child's becoming and cannot accurately see things from a child's perspective [30].

607 Effective injury prevention efforts at school are important and should address several factors  
608 (i.e., Individual, interpersonal, environmental and policy). However, improvements to the  
609 physical environment of the school through regular safety assessments, good quality  
610 maintenance, and repairing hazards immediately after they are identified [67], can contribute  
611 to the safety of the school children without the need to restrict children's access to specific  
612 areas. Although the safety of children should be paramount, children should also be allowed  
613 some freedom to choose the activities they wish to take part in, to be able to begin to explore  
614 the concept of becoming physically literate. Physical literacy, focuses on the lived body, the  
615 embodied dimension of human existence [63], therefore nurturing this aspect of children's  
616 lives will make a distinctive contribution to their becoming.

617 As mentioned previously, football dominated the playground, monopolising the space  
618 available. Cashmore and Dixon [68] explain that football is inescapable, a sport ingrained into  
619 the fabric of communities. It would seem that this is also the case within primary school

620 playgrounds, where football remains the activity dominating the available space. Therefore,  
621 as many children engage in this activity during break-times, it can be considered an important  
622 and effective catalyst for physical activity participation. However, the barriers that this  
623 dominance presents to children, either not interested in football or who have yet to  
624 demonstrate an acceptable skill level, cannot be overlooked [33,58,69]. Conversely, as  
625 previous focus group studies with children have suggested, it is the lack of alternative space  
626 that is the main concern [69] and removing the facilities for football would remove opportunities  
627 for the large numbers of children who currently use football as a means of being physically  
628 active. Therefore, provision of additional space and/or more effective use of the current space,  
629 alongside more inclusive and enjoyable activities for boys and girls is needed.

630 The findings from this qualitative evaluation provides an opportunity for primary schools which  
631 match the description of the schools participating in this study, to reflect on primary school  
632 playground strategies and practices that are implemented at policy level. However, this study  
633 is not without its limitations. Firstly, restricting recruitment to year five and year six children  
634 may have overlooked the barriers that exist in the younger key stage 2 children, particularly 7  
635 year olds, who will have just been introduced to this new playground. This limits the ability to  
636 generalise this study's findings to children of different age groups who are likely to have a  
637 different playground experience. As this study did not receive any funding there was a limit to  
638 the number of schools and participants the research staff could manage in the time frame.  
639 However, limiting the sample to two year groups from four schools allowed for a more  
640 comprehensive data acquisition, evaluation and synthesis. Regarding the concept of the 'adult  
641 filter', the authors of this study cannot remove their own subconscious adult filter and adult  
642 embodiment; however, the comprehensive, flexible and robust methods employed during child  
643 focus groups, in addition to the use of respondent validation techniques is a strength of this  
644 study and minimises any inaccuracies in the adult interpretation. Furthermore, the use of two  
645 authors throughout data collection, transcription and analysis enhances the trustworthiness of  
646 the findings presented in this study. In addition, due to staff concerns with interviews



647 (mentioned previously) all staff responses were completed using questionnaires, limiting a  
648 more in-depth investigation of the answers provided. It is hypothesised that a more  
649 comprehensive response and discussion would be possible using interview methods, and  
650 every effort should be made to remove the barriers perceived by members of staff in this study  
651 in future studies. Finally, this data was collected prior to the COVID-19 pandemic. During the  
652 pandemic in the UK, primary schools changed the structure of break-times, increasing the  
653 number of breaks for fresh air throughout the day. This change in structure might have affected  
654 children and staff perceptions of the value of break-times. Future research should explore the  
655 effect the COVID-19 pandemic had on the perceptions of school break-times during and post  
656 pandemic.

657 By attempting to understand the effect of the various complex interactions that exist within  
658 primary school playgrounds will help raise awareness within schools of the implications of  
659 supervisory interactions, judgement and management of behaviour, on the health and  
660 wellbeing of pupils [70].

## 661 **References**

- 662 1. Sport England (2019). Active lives children and young people survey  
663 2017/18. Accessed January 2020.
- 664 2. Guthold R, Cowan MJ, Autenrieth CS, Kann L, Riley LM. Physical  
665 activity and sedentary behavior among schoolchildren: a 34-country  
666 comparison. *The journal of paediatrics*. 2010;157(1): p.43-49
- 667 3. Steene-Johannessen J, Hansen BH, Dalene KE, Kolle E, Northstone  
668 K, Møller NC, et al. Variations in accelerometry measured physical  
669 activity and sedentary time across Europe – harmonized analyses of  
670 47,497 children and adolescents. *International Journal of  
671 Behavioural Nutrition and Physical Activity*. 2020;17(38)

- 672 4. Ekelund U, Anderssen SA, Froberg K, Sardinha LB, Andersen LB,  
673 Brage S. Independent associations of physical activity and  
674 cardiorespiratory fitness with metabolic risk factors in children: the  
675 European youth heart study. *Diabetologia*. 2007;50(9): p.1832-1840
- 676 5. Peplies J, Börnhorst C, Günther K, Fraterman A, Russo P,  
677 Veidebaum T, et al. & on behalf of the IDEFICS consortium.  
678 Longitudinal associations of lifestyle factors and weight status with  
679 insulin resistance (HOMA-IR) in preadolescent children: the large  
680 prospective cohort study IDEFICS. *International journal of behavioral  
681 nutrition and physical activity*. 2016;13: p.97
- 682 6. Poitras VJ, Gray CE, Borghese MM, Carson V, Chaput JP, Janssen  
683 I. et al. Systematic review of the relationships between objectively  
684 measured physical activity and health indicators in school-aged  
685 children and youth. *Applied Physiology, Nutrition, and Metabolism*.  
686 2016;41(6): p.S197-S239.
- 687 7. Biddle SJ, Ciaccioni S, Thomas G. Vergeer, I. Physical activity and  
688 mental health in children and adolescents: An updated review of  
689 reviews and an analysis of causality. *Psychology of Sport and  
690 Exercise*. 2019;42: p.146-155.
- 691 8. Escalante Y, García-Hermoso A, Backx K, Saavedra JM. Playground  
692 designs to increase physical activity levels during school recess: a  
693 systematic review. *Health Educ Behav*. 2014;41(2): p.138-144
- 694 9. Sterdt E, Liersch S, Walter U. Correlates of physical activity of  
695 children and adolescents: a systematic review of reviews. *Health  
696 Education Journal*. 2014;73(1): p.72-89.

- 697 10. World Health Organization (2018) Global Action plan on physical  
698 activity 2018-2030: More active people for a healthier world. Geneva
- 699 11. Wilkie HJ, Standage M, Gillison FB, Cumming SP, Katzmarzyk PT.  
700 Correlates of intensity-specific physical activity in children aged 9–11  
701 years: a multilevel analysis of UK data from the International Study  
702 of Childhood Obesity, Lifestyle and the Environment. *BMJ Open*.  
703 2018;8:e018373
- 704 12. Tsuda E, Goodway JD, Famelia R, Brian AS, Collins ME. The  
705 Relationship Between Motor Competence and Sedentary Behavior  
706 on the Preschool Playground. *Research Quarterly for Exercise and*  
707 *Sport*. 2016;87(Supplement 2): p.A33.
- 708 13. Bronfenbrenner U. Toward an experimental ecology of human  
709 development. *American psychologist*. 1977;32 (7): p. 513
- 710 14. Sallis JF, Bauman A, Pratt M. Environmental and policy interventions  
711 to promote physical activity. *American Journal of Preventive*  
712 *Medicine*. 1998;15: p.379-97
- 713 15. Golden SD, Earp JA. Social ecological approaches to individuals and  
714 their contexts: twenty years of health education & behavior health  
715 promotion interventions. *Health education & behavior*.  
716 2012;39(3):364-72.
- 717 16. Hyndman B, Telford A, Finch C, Benson A. Moving physical activity  
718 beyond the school classroom: a social-ecological insight for teachers  
719 of the facilitators and barriers to students' non-curricular physical  
720 activity. *Australian J Teach Educ*. 2012;37(2): p.1-24

- 721 17. Hyndman B, Chancellor B. Engaging children in activities beyond the  
722 classroom walls: a social–ecological exploration of Australian  
723 primary school children's enjoyment of school play activities. *Journal*  
724 *of Playwork Practice*. 2015;2(2): p.117-141.
- 725 18. Wechsler H, Devereaux RS, Davis M, Collins J. Using the school  
726 environment to promote physical activity and healthy eating.  
727 *Preventive medicine*. 2000; 31(2), S121-S137
- 728 19. Gråstén A, Watt A, Liukkonen J, Jaakkola T. Effects of School-Based  
729 Physical Activity Program on Students Moderate-to-Vigorous  
730 Physical Activity and Perceptions of Physical Competence. *J Phys*  
731 *Act Health*. 2017;14: p.455-464.
- 732 20. Baines E, Blatchford P. School break times and young people's  
733 social lives: A follow up national study. Executive summary,  
734 Department of Psychology and human development, UCL institute of  
735 Education, London. 2019
- 736 21. Mulryan-Kyne C. The school playground experience: opportunities  
737 and challenges for children and school staff. *Educational Studies*.  
738 2014;40(4): p.377-395.
- 739 22. Blatchford P, Pellegrini AD, Baines E. *The child at school (2nd ed):*  
740 *Interactions with peers and teachers*. Routledge, London, 2016.
- 741 23. Holloway SL. Changing children's geographies. *Children's*  
742 *Geographies*. 2014;12(4): p.377-392.
- 743 24. Colabianchi N, Maslow A, Swayampakala K. Features and amenities  
744 of school playgrounds: A direct observation study of utilization and

- 745 physical activity levels outside of school time. The international  
746 journal of behavioral nutrition and physical activity. 2011;8(32).
- 747 25. Parrish AM, Okely AD, Stanley RM, Ridgers ND. The effect of school  
748 recess interventions on physical activity. Sports medicine.  
749 2013;43(4): pp.287-299.
- 750 26. Parrish AM, Chong KH, Moriarty AL, Batterham M, Ridgers ND.  
751 Interventions to change school recess activity levels in children and  
752 adolescents: A systematic review and meta-analysis. Sports  
753 Medicine. 2020;50: pp. 2145–2173.
- 754 27. Graham M, Wright M, Azevedo LB, Macpherson T, Jones D, Innerd  
755 A. The school playground environment as a driver of primary school  
756 children’s physical activity behaviour: A direct observation case  
757 study. Journal of Sports Sciences. 2021;4: pp.1-13
- 758 28. Youth sport trust (2018) How to spend it: A guide to Primary PE and  
759 Sport Premium. Published 2nd March 2018: Accessed: 31st Jan  
760 2020. Available from  
761 [https://www.youthsporttrust.org/resources/primary-pe-sport-  
762 premium](https://www.youthsporttrust.org/resources/primary-pe-sport-<br/>762 premium)
- 763 29. UK Department of health Physical activity: applying all our health.  
764 October 2019. Available from  
765 [https://www.gov.uk/government/publications/physical-activity-  
766 applying-all-our-health](https://www.gov.uk/government/publications/physical-activity-<br/>766 applying-all-our-health)
- 767 30. Jones O. ‘True geography [ ] quickly forgotten, giving away to adult-  
768 imagined universe’. Approaching the otherness of childhood.  
769 Children’s Geographies. 2008;6(2): p.195-212

- 770 31. Kellett M. Children as active researchers: a new research paradigm  
771 for the 21st century? Economic and Social Research Council: 2005.  
772 accessed 26th November 2019
- 773 32. Matthews H. Rising four: Reflections on the state of growing up.  
774 Children's Geographies. 2005;3(13): p.271-273
- 775 33. Thomson S. Do's and don'ts: children's experiences of the primary  
776 school playground. Environmental Education Research. 2007;13(4):  
777 p.487-500.
- 778 34. Ridgers ND, Fairclough SJ, Stratton G Twelve-Month Effects of a  
779 Playground Intervention on Children's Morning and Lunchtime  
780 Recess Physical Activity Levels. Journal of Physical Activity and  
781 Health. 2010;7(2): p.167-175
- 782 35. Snow D, Bundy A, Tranter P, Wyver S, Naughton G, Ragen J et al.  
783 Girls' perspectives on the ideal school playground experience: an  
784 exploratory study of four Australian primary schools. Children's  
785 Geographies. 2019;17(2): p.148-161.
- 786 36. Tong A, Sainsbury P, Craig J. Consolidated criteria for reporting  
787 qualitative research (COREQ): a 32-item checklist for interviews and  
788 focus groups. International Journal for Quality in Health Care.  
789 2007;19(6): p.349–357
- 790 37. Thomas J, Harden A. Methods for the thematic synthesis of  
791 qualitative research in systematic reviews. BMC Med Res Methodol.  
792 2008;8:45
- 793 38. Agar M, ManDonald J, Basch CE, Bertrand JT, Brown JE, Ward VM  
794 et al. Exploring children's views through focus groups. In Greene S.,

- 795 and Hogan D Researching Children's' Experience. Sage  
796 publications, London. 2005
- 797 39. Gray, D. Doing Research in the Real World 4th Edition. Sage. 2018
- 798 40. Punch S. Interviewing strategies with young people: the secret box,  
799 a stimulus material and task-based activities. Children and Society.  
800 2002;16(1): p.45-56
- 801 41. Gibson F. Conducting focus groups with children and young people:  
802 strategies for success. Journal of research in nursing. 2007;12(5):  
803 473-483
- 804 42. Veitch J, Salmon J, Ball K. Children's active free play in local  
805 neighbourhoods: a behavioural mapping study. Health Educ Res.  
806 2008;23(5): p.870-879
- 807 43. Forero R, Nahidi S, De Costa J, Mohsin M, Fitzgerald G, Gibson N.  
808 et al. Application of four-dimension criteria to assess rigour of  
809 qualitative research in emergency medicine. BMC Health Serv Res.  
810 2018;18: p.120
- 811 44. McKenzie TL, Crespo NC, Baquero B, Elder JP. Leisure time  
812 physical activity in elementary schools: analysis of contextual  
813 conditions. J Sch Healt. 2010;80(10): p.470-477
- 814 45. Caro HEE, Altenburg TM, Dedding C, Chinapaw MJM. Dutch primary  
815 schoolchildren's perspectives of activity-friendly school playgrounds:  
816 A participatory study. Int J Environ Res Public Health. 2016;13(6):  
817 p.526
- 818 46. Chancellor B, Hyndman B. 'Adult Decisions on Students' Play Within  
819 Primary School Playgrounds'. In Hyndman B. Contemporary School

- 820 Playground Strategies for Healthy Students; Springer, Singapore:  
821 p.37-55. 2017
- 822 47. Hill M, Laybourn A, Borland M. Engaging with primary-aged children  
823 about their emotions and well-being: Methodological considerations.  
824 Children and Society. 1996;10(2): p.129-144
- 825 48. Braun V, Clarke V. Using thematic analysis in psychology. Qualitative  
826 Research in Psychology. 2006;3(2): p.77-101
- 827 49. Nowell LS, Norris JM, White DE, Moules NJ. Thematic Analysis:  
828 Striving to Meet the Trustworthiness Criteria. International Journal of  
829 Qualitative Methods. 2017;16(1).
- 830 50. Rutakumwa R, Mugisha JO, Bernays S, Kabunga E, Tumwekwase  
831 G, Mbonye M. et al. Conducting in-depth interviews with and without  
832 voice recorders: a comparative analysis. Qualitative Research.  
833 2019;20(5): pp.565-581
- 834 51. Barbour AC. The impact of playground design on the play behaviors  
835 of children with differing levels of physical competence. Early Child  
836 Res Q. 1999;14(1): pp.75-98
- 837 52. Parrish AM, Yeatman H, Iverson D, Russell K. Using interviews and  
838 peer pairs to better understand how school environments affect  
839 young children's playground physical activity levels: a qualitative  
840 study. Health education research. 2012;27(2): p.269-280
- 841 53. Jones D, Innerd A, Giles EL, Azevedo LB. Association between  
842 fundamental motor skills and physical activity in the early years: A  
843 systematic review and meta-analysis. Journal of Sport and Health  
844 Science. 2020;9: p.542-552



- 845 54. Connell RW. Gender and power: Society, the person and sexual  
846 politics. Cambridge: Polity Press. 1987
- 847 55. Renold E. 'All they've got in their brains is football.' Sport, masculinity  
848 and the gendered practices of playground relations. Sport, Educ Soc.  
849 1997;2: p.5–23
- 850 56. Epstein D, Kehily M, Mac An Ghail M, Redman P. Boys and girls  
851 come out to play: Making masculinities and femininities in school  
852 playgrounds. Men and masculinities. 2001;4(2): p.158-172
- 853 57. Paechter C, Clark S. Learning gender in primary school playgrounds:  
854 findings from the Tomboy Identities Study. Pedagogy, Culture &  
855 Society. 2007;15:3: p.317-331
- 856 58. Pearce G, Bailey RP. Football pitches and Barbie dolls: young  
857 children's perceptions of their school playground. Early Child  
858 Development and Care. 2011;181(10): p.1361-1379
- 859 59. Baines E., and Blatchford P. School break times and young people's  
860 social lives. Research Briefing 1, UCL Institute of Education, London.  
861 2019
- 862 60. Saunders TJ, Chaput JP, Tremblay MS. "Sedentary Behaviour as an  
863 Emerging Risk Factor for Cardiometabolic Diseases in Children and  
864 Youth." Canadian Journal of Diabetes. 2014;38(1): p.53–61
- 865 61. Mackintosh KA, Ridley K, Stratton G, Ridgers ND. Energy cost of  
866 free-play activities in 10-to 11-year-old children. Journal of Physical  
867 Activity and Health. 2016;13(s1): p.S71-S74.

- 868 62. Whitehead M. Definition of physical literacy and clarification of  
869 related issues. *ICSSPE Bull J Sport Sci Phys Educ.* 2013;65: p.29-  
870 34
- 871 63. Whitehead M. Physical Literacy: Philosophical Considerations in  
872 Relation to Developing a Sense of Self, Universality and  
873 Propositional Knowledge. *Sport, Ethics and Philosophy.* 2007;1(3):  
874 p.281-298
- 875 64. Crease RP. The pleasure of popular dance. *Journal of the Philosophy*  
876 *of Sport.* 2002;29(2): p.106-120.
- 877 65. Hyndman B, Telford A. Should educators be 'wrapping school  
878 playgrounds in cotton wool' to encourage physical activity? Exploring  
879 primary and secondary students' voices from the school playground.  
880 *Australian J Teach Educ.* 2015;40(6): p.60-84
- 881 66. Ridgers ND, Stratton G, Fairclough SJ. Physical activity levels of  
882 children during school playtime. *Sports Med.* 2006;36(4): p.359-71
- 883 67. Salminen S, Kurenniemi M, Råback M, Markkula J, Lounamaa A.  
884 School environment and school injuries. *Frontiers in public health.*  
885 2014;1: p.76.
- 886 68. Cashmore E., Dixon, K. eds. *Studying football.* Routledge, London.  
887 2016
- 888 69. Martínez-Andrés M, Bartolomé-Gutiérrez R, Rodríguez-Martín B,  
889 Pardo-Guijarro MJ, Martínez-Vizcaíno V. "Football is a boys' game":  
890 children's perceptions about barriers for physical activity during  
891 recess time. *International journal of qualitative studies on health and*  
892 *well-being.* 2017;12(sup2):1379338

- 893           70. Chancellor B, Hyndman B. The rush to judgement: Mapping moral  
894           geographies of the primary school playground. *Global Studies of*  
895           *Childhood*. 2017;7(1): p.38–50

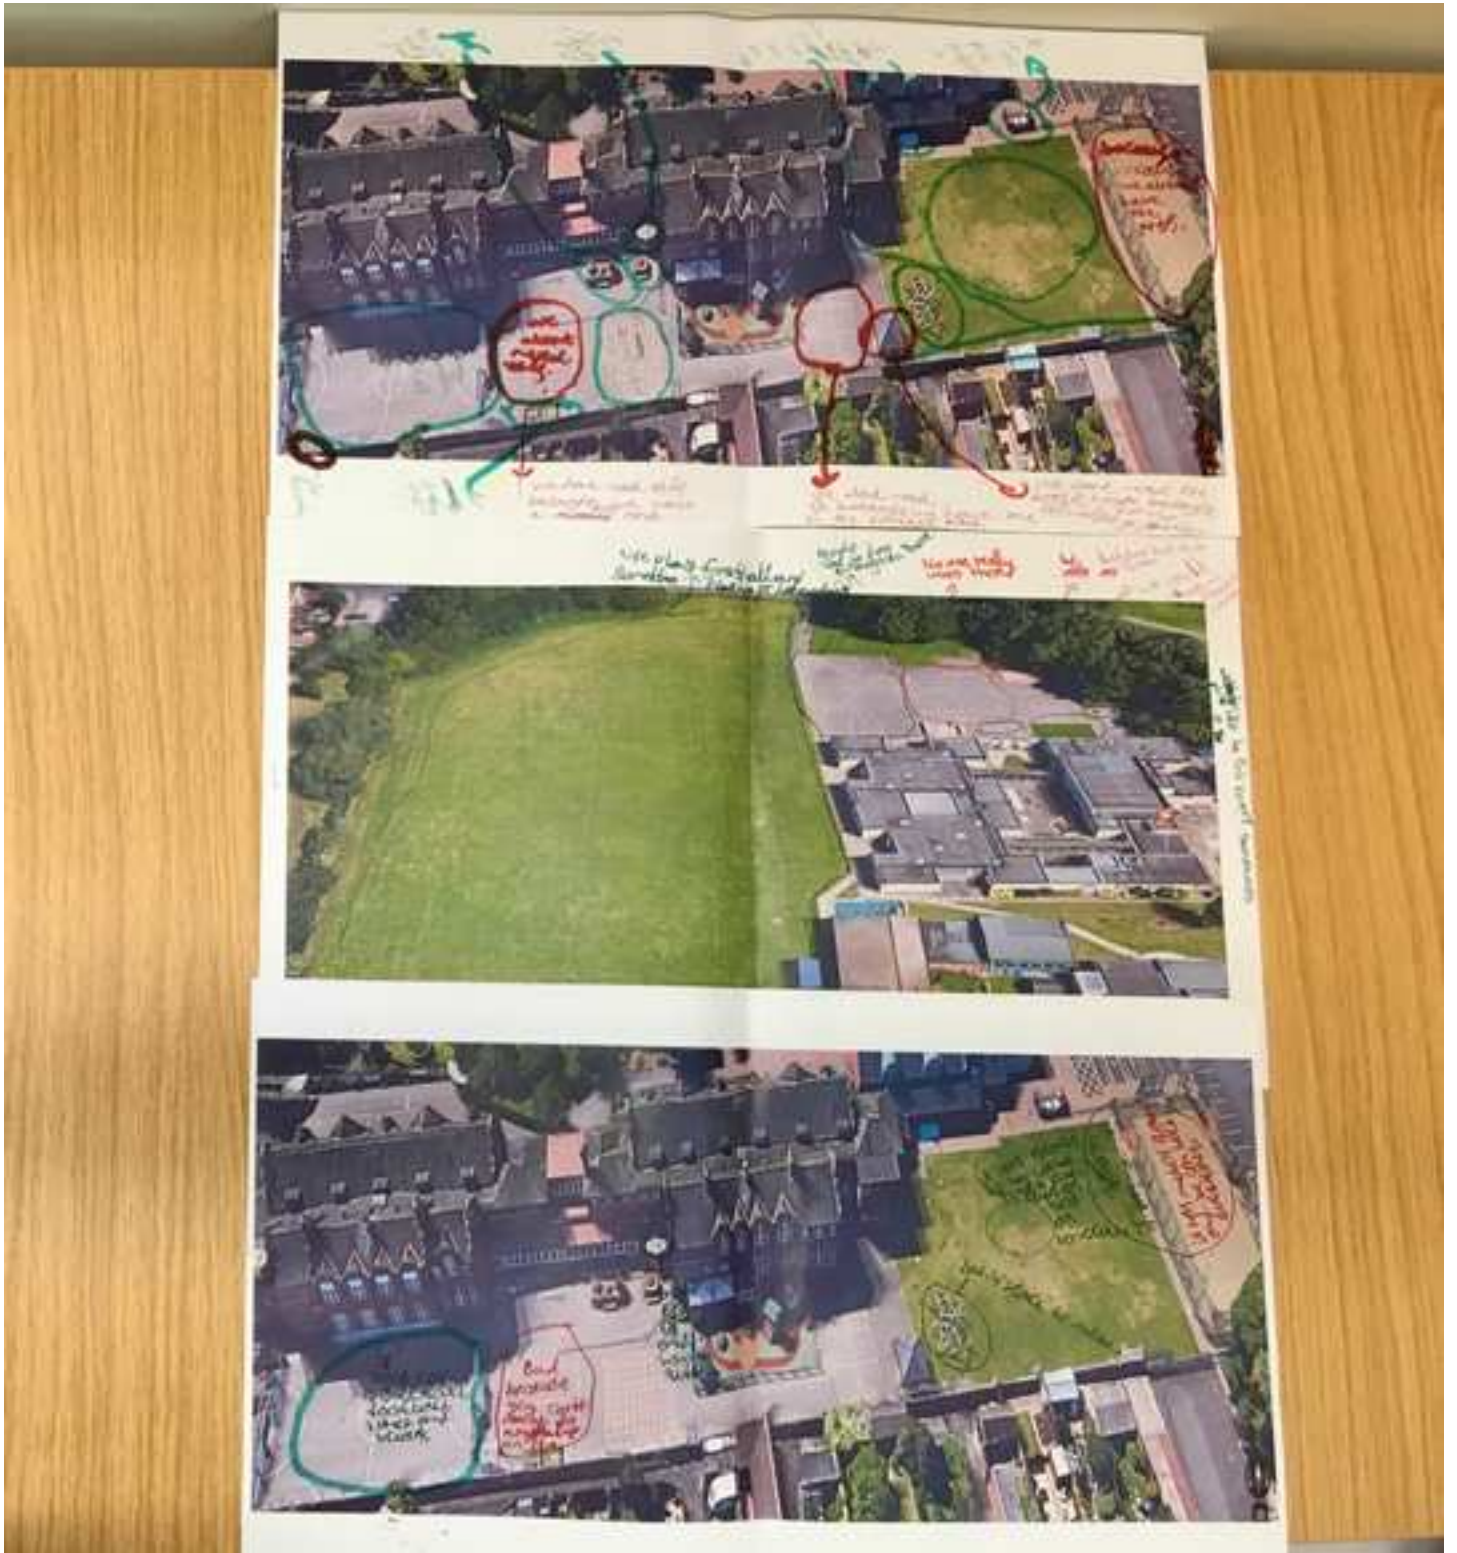

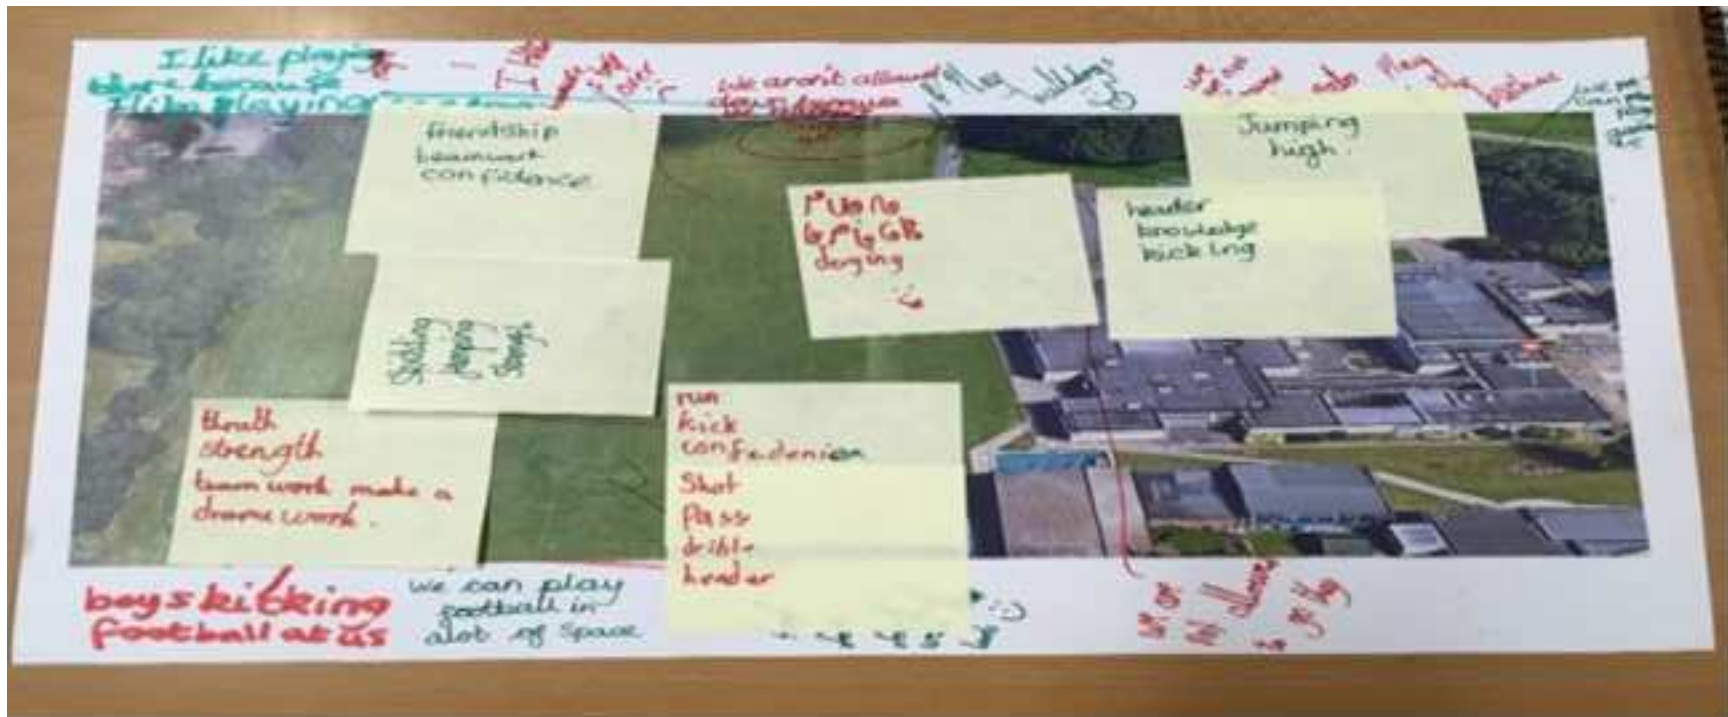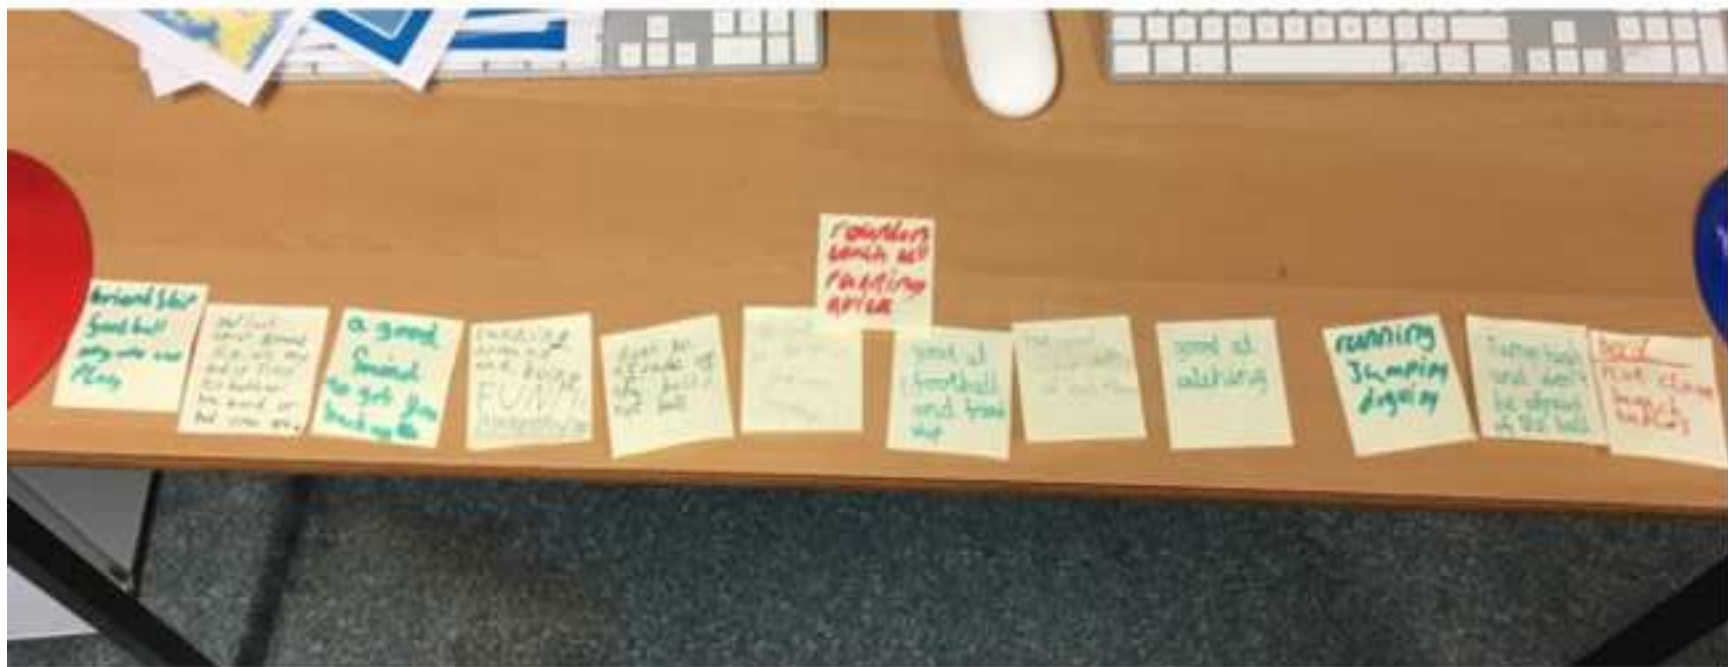

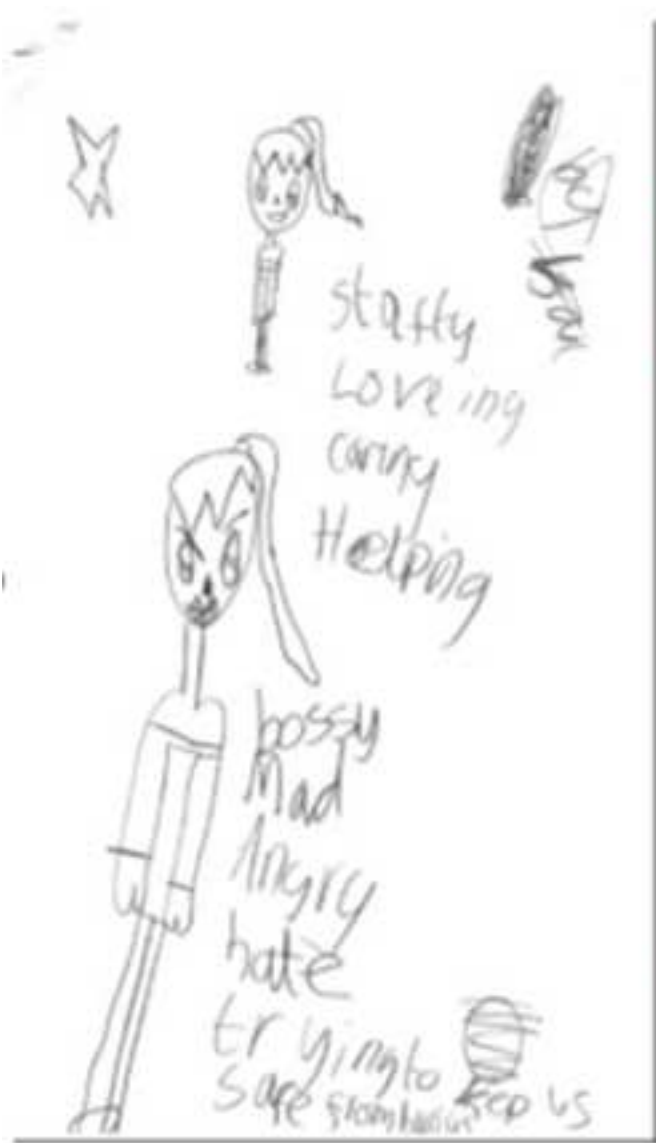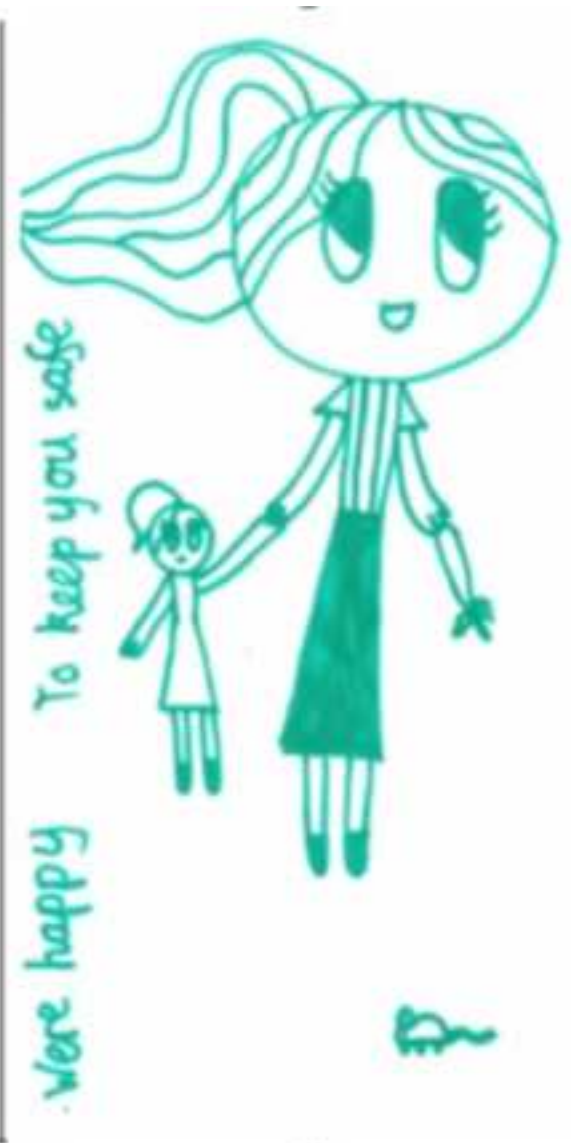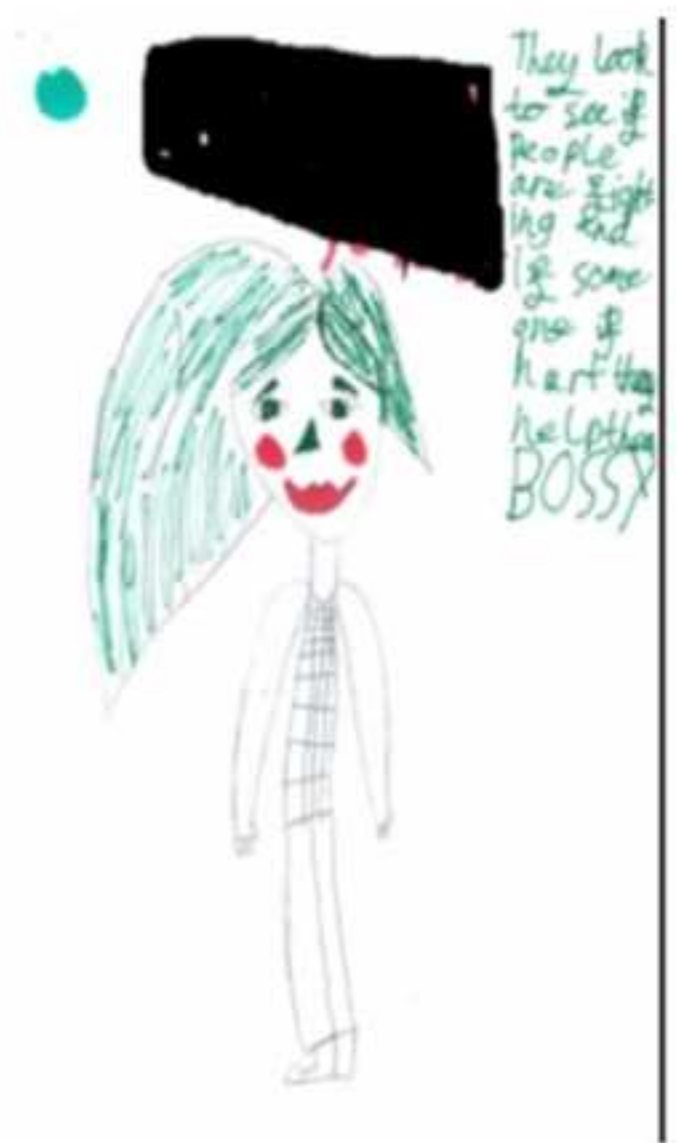

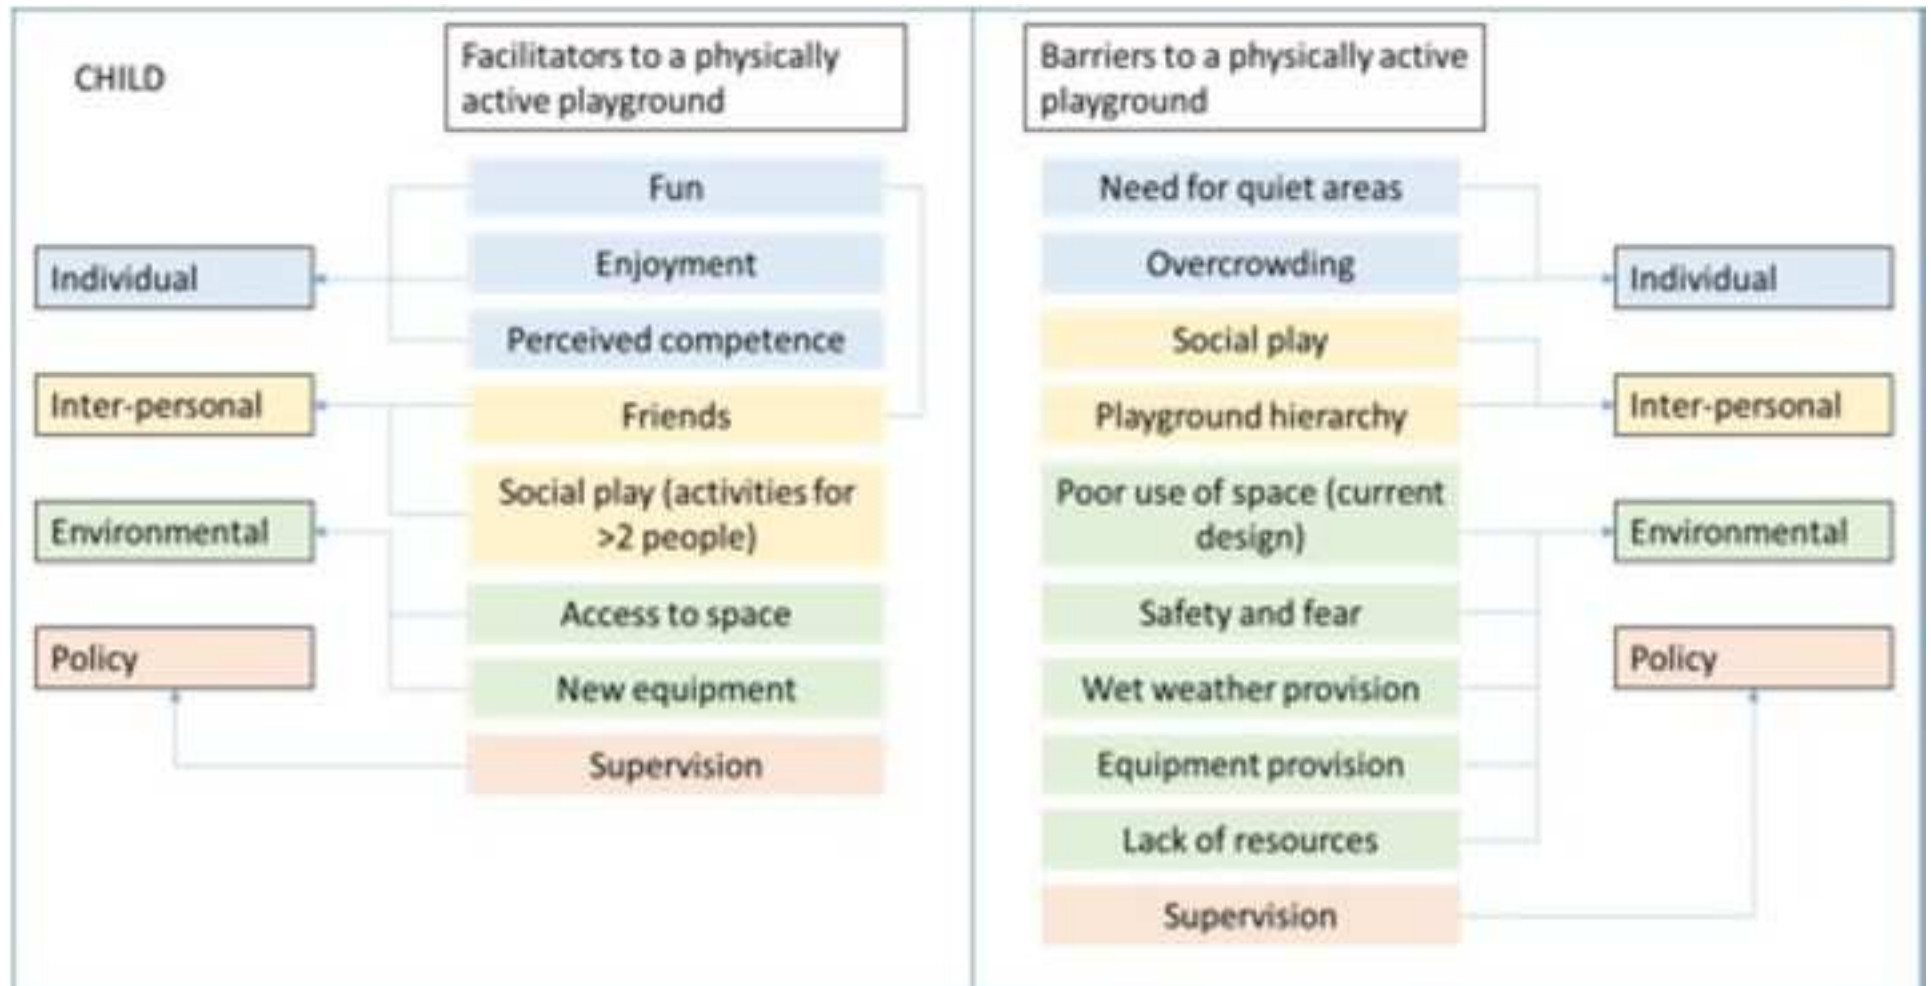

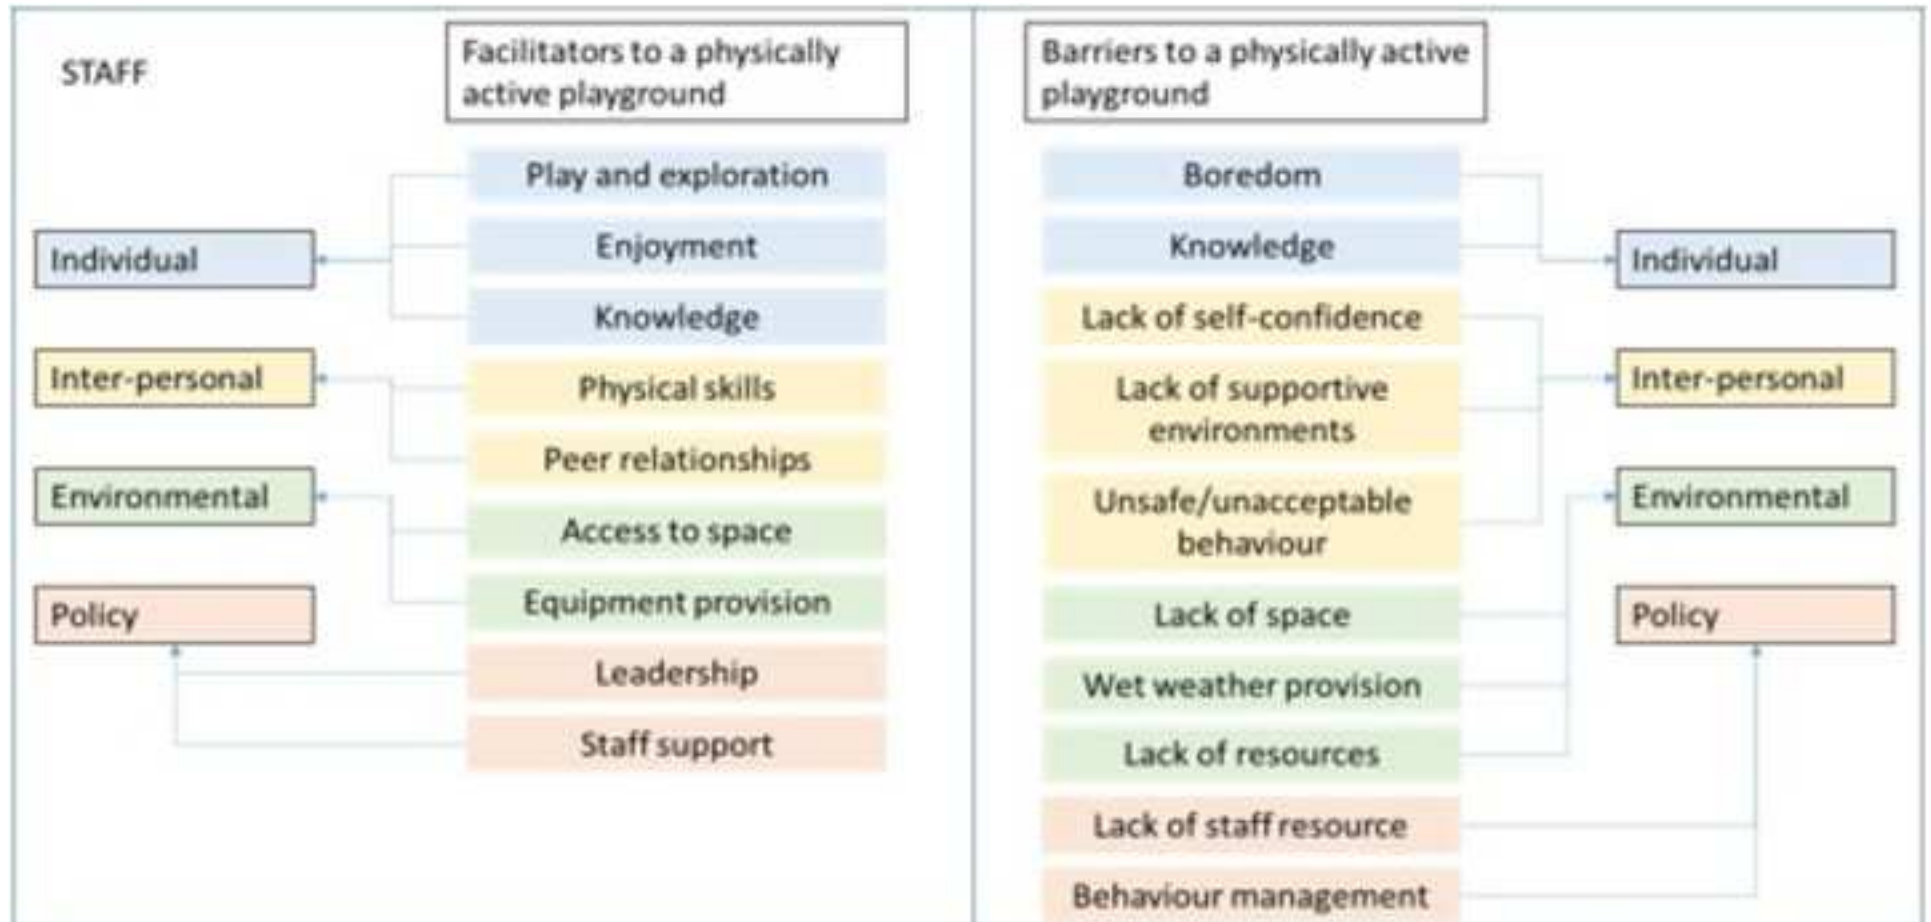

Supplement: pone.0261812.s003.pdf [file pone.0261812.s003.pdf]
